# Supplementary material for: Prediction of Natural Products as Binding Molecules to COVID- 19 Spike Proteins
Source: Research Square preprint supplement (doi:10.21203/rs.3.rs-1371398/v1), 2022-03-15
Supplement: Supplementary file 1 [file a34e007a8ac26b5f9fc29b7d.xlsx]

## Sheet: Relation
Drug ID	Metabolite ID	I(S)	T(D,M)	W(S,D,M)	Protein type	code	smile	Cluster	Target	Host	ki	g	ic50	kd	ec50	koff	kon	ph	tmp
D10129	C00003684	0.5	1	0.5	Spike glycoprotein,Collagen alpha-1(I) chain	7e7b_A	CC(=O)OC(C)(C)\C=C\C(=O)C(C)(O)C1[C@H](O)C[C@@]2(C)C3CC=C4C(CC[C@@H](O)C4(C)C)[C@]3(CO)C(=O)C[C@]12C	1	Bcl-2-like protein 11	(Homo sapiens (Human))					>3.50E+5
D10129	C00003684	0.5	1	0.5	Spike glycoprotein,Collagen alpha-1(I) chain	7e7b_C	CC(=O)OC(C)(C)\C=C\C(=O)C(C)(O)C1[C@H](O)C[C@@]2(C)C3CC=C4C(CC[C@@H](O)C4(C)C)[C@]3(CO)C(=O)C[C@]12C	1	Bcl-2-like protein 11	(Homo sapiens (Human))					>3.50E+5
D10129	C00003684	0.5	1	0.5	Spike glycoprotein,Collagen alpha-1(I) chain	7e7d_A	CC(=O)OC(C)(C)\C=C\C(=O)C(C)(O)C1[C@H](O)C[C@@]2(C)C3CC=C4C(CC[C@@H](O)C4(C)C)[C@]3(CO)C(=O)C[C@]12C	1	Bcl-2-like protein 11	(Homo sapiens (Human))					>3.50E+5
D10129	C00003684	0.5	1	0.5	Spike glycoprotein,Collagen alpha-1(I) chain	7e7d_C	CC(=O)OC(C)(C)\C=C\C(=O)C(C)(O)C1[C@H](O)C[C@@]2(C)C3CC=C4C(CC[C@@H](O)C4(C)C)[C@]3(CO)C(=O)C[C@]12C	1	Bcl-2-like protein 11	(Homo sapiens (Human))					>3.50E+5
D10130	C00003683	0.5	1	0.5	Spike glycoprotein,Collagen alpha-1(I) chain	7e7b_A	CC(=O)OC(C)(C)\C=C\C(=O)[C@@](C)(O)[C@H]1[C@H](O)C[C@@]2(C)[C@@H]3CC=C4[C@@H](C[C@H](O)C(=O)C4(C)C)[C@]3(C)C(=O)C[C@]12C	1	Bcl-2-like protein 11	(Homo sapiens (Human))					>3.50E+5
D10130	C00003683	0.5	1	0.5	Spike glycoprotein,Collagen alpha-1(I) chain	7e7b_C	CC(=O)OC(C)(C)\C=C\C(=O)[C@@](C)(O)[C@H]1[C@H](O)C[C@@]2(C)[C@@H]3CC=C4[C@@H](C[C@H](O)C(=O)C4(C)C)[C@]3(C)C(=O)C[C@]12C	1	Bcl-2-like protein 11	(Homo sapiens (Human))					>3.50E+5
D10130	C00003683	0.5	1	0.5	Spike glycoprotein,Collagen alpha-1(I) chain	7e7d_A	CC(=O)OC(C)(C)\C=C\C(=O)[C@@](C)(O)[C@H]1[C@H](O)C[C@@]2(C)[C@@H]3CC=C4[C@@H](C[C@H](O)C(=O)C4(C)C)[C@]3(C)C(=O)C[C@]12C	1	Bcl-2-like protein 11	(Homo sapiens (Human))					>3.50E+5
D10130	C00003683	0.5	1	0.5	Spike glycoprotein,Collagen alpha-1(I) chain	7e7d_C	CC(=O)OC(C)(C)\C=C\C(=O)[C@@](C)(O)[C@H]1[C@H](O)C[C@@]2(C)[C@@H]3CC=C4[C@@H](C[C@H](O)C(=O)C4(C)C)[C@]3(C)C(=O)C[C@]12C	1	Bcl-2-like protein 11	(Homo sapiens (Human))					>3.50E+5
D10473	C00035257	0.5	1	0.5	Spike glycoprotein,Collagen alpha-1(I) chain	7e7b_A	CC1(C)C[C@H](O)[C@]2(CO)[C@H](O)C[C@]3(C)C(=CCC4[C@@]5(C)CC[C@H](O)C(C)(C)C5CC[C@@]34C)[C@@H]2C1	1	Bcl-2-like protein 11	(Homo sapiens (Human))					>3.50E+5
D10473	C00035257	0.5	1	0.5	Spike glycoprotein,Collagen alpha-1(I) chain	7e7b_C	CC1(C)C[C@H](O)[C@]2(CO)[C@H](O)C[C@]3(C)C(=CCC4[C@@]5(C)CC[C@H](O)C(C)(C)C5CC[C@@]34C)[C@@H]2C1	1	Bcl-2-like protein 11	(Homo sapiens (Human))					>3.50E+5
D10473	C00035257	0.5	1	0.5	Spike glycoprotein,Collagen alpha-1(I) chain	7e7d_A	CC1(C)C[C@H](O)[C@]2(CO)[C@H](O)C[C@]3(C)C(=CCC4[C@@]5(C)CC[C@H](O)C(C)(C)C5CC[C@@]34C)[C@@H]2C1	1	Bcl-2-like protein 11	(Homo sapiens (Human))					>3.50E+5
D10473	C00035257	0.5	1	0.5	Spike glycoprotein,Collagen alpha-1(I) chain	7e7d_C	CC1(C)C[C@H](O)[C@]2(CO)[C@H](O)C[C@]3(C)C(=CCC4[C@@]5(C)CC[C@H](O)C(C)(C)C5CC[C@@]34C)[C@@H]2C1	1	Bcl-2-like protein 11	(Homo sapiens (Human))					>3.50E+5
D10615	C00000347	0.5	1	0.5	Spike glycoprotein,Collagen alpha-1(I) chain	7e7b_A	CCCCCCCC\C=C/CCCCCCCC(O)=O	1	Bcl-2-like protein 11	(Homo sapiens (Human))					>3.50E+5
D10615	C00000347	0.5	1	0.5	Spike glycoprotein,Collagen alpha-1(I) chain	7e7b_C	CCCCCCCC\C=C/CCCCCCCC(O)=O	1	Bcl-2-like protein 11	(Homo sapiens (Human))					>3.50E+5
D10615	C00000347	0.5	1	0.5	Spike glycoprotein,Collagen alpha-1(I) chain	7e7d_A	CCCCCCCC\C=C/CCCCCCCC(O)=O	1	Bcl-2-like protein 11	(Homo sapiens (Human))					>3.50E+5
D10615	C00000347	0.5	1	0.5	Spike glycoprotein,Collagen alpha-1(I) chain	7e7d_C	CCCCCCCC\C=C/CCCCCCCC(O)=O	1	Bcl-2-like protein 11	(Homo sapiens (Human))					>3.50E+5
D10615	C00001217	0.5	1	0.5	Spike glycoprotein,Collagen alpha-1(I) chain	7e7b_A	CCCCCCCC\C=C/CCCCCCCC(O)=O	1	Bcl-2-like protein 11	(Homo sapiens (Human))					>3.50E+5
D10615	C00001217	0.5	1	0.5	Spike glycoprotein,Collagen alpha-1(I) chain	7e7b_C	CCCCCCCC\C=C/CCCCCCCC(O)=O	1	Bcl-2-like protein 11	(Homo sapiens (Human))					>3.50E+5
D10615	C00001217	0.5	1	0.5	Spike glycoprotein,Collagen alpha-1(I) chain	7e7d_A	CCCCCCCC\C=C/CCCCCCCC(O)=O	1	Bcl-2-like protein 11	(Homo sapiens (Human))					>3.50E+5
D10615	C00001217	0.5	1	0.5	Spike glycoprotein,Collagen alpha-1(I) chain	7e7d_C	CCCCCCCC\C=C/CCCCCCCC(O)=O	1	Bcl-2-like protein 11	(Homo sapiens (Human))					>3.50E+5
D10615	C00001232	0.5	1	0.5	Spike glycoprotein,Collagen alpha-1(I) chain	7e7b_A	CCCCCCCC\C=C/CCCCCCCC(O)=O	1	Bcl-2-like protein 11	(Homo sapiens (Human))					>3.50E+5
D10615	C00001232	0.5	1	0.5	Spike glycoprotein,Collagen alpha-1(I) chain	7e7b_C	CCCCCCCC\C=C/CCCCCCCC(O)=O	1	Bcl-2-like protein 11	(Homo sapiens (Human))					>3.50E+5
D10615	C00001232	0.5	1	0.5	Spike glycoprotein,Collagen alpha-1(I) chain	7e7d_A	CCCCCCCC\C=C/CCCCCCCC(O)=O	1	Bcl-2-like protein 11	(Homo sapiens (Human))					>3.50E+5
D10615	C00001232	0.5	1	0.5	Spike glycoprotein,Collagen alpha-1(I) chain	7e7d_C	CCCCCCCC\C=C/CCCCCCCC(O)=O	1	Bcl-2-like protein 11	(Homo sapiens (Human))					>3.50E+5
D10615	C00001234	0.5	1	0.5	Spike glycoprotein,Collagen alpha-1(I) chain	7e7b_A	CCCCCCCC\C=C/CCCCCCCC(O)=O	1	Bcl-2-like protein 11	(Homo sapiens (Human))					>3.50E+5
D10615	C00001234	0.5	1	0.5	Spike glycoprotein,Collagen alpha-1(I) chain	7e7b_C	CCCCCCCC\C=C/CCCCCCCC(O)=O	1	Bcl-2-like protein 11	(Homo sapiens (Human))					>3.50E+5
D10615	C00001234	0.5	1	0.5	Spike glycoprotein,Collagen alpha-1(I) chain	7e7d_A	CCCCCCCC\C=C/CCCCCCCC(O)=O	1	Bcl-2-like protein 11	(Homo sapiens (Human))					>3.50E+5
D10615	C00001234	0.5	1	0.5	Spike glycoprotein,Collagen alpha-1(I) chain	7e7d_C	CCCCCCCC\C=C/CCCCCCCC(O)=O	1	Bcl-2-like protein 11	(Homo sapiens (Human))					>3.50E+5
D10615	C00001235	0.5	1	0.5	Spike glycoprotein,Collagen alpha-1(I) chain	7e7b_A	CCCCCCCC\C=C/CCCCCCCC(O)=O	1	Bcl-2-like protein 11	(Homo sapiens (Human))					>3.50E+5
D10615	C00001235	0.5	1	0.5	Spike glycoprotein,Collagen alpha-1(I) chain	7e7b_C	CCCCCCCC\C=C/CCCCCCCC(O)=O	1	Bcl-2-like protein 11	(Homo sapiens (Human))					>3.50E+5
D10615	C00001235	0.5	1	0.5	Spike glycoprotein,Collagen alpha-1(I) chain	7e7d_A	CCCCCCCC\C=C/CCCCCCCC(O)=O	1	Bcl-2-like protein 11	(Homo sapiens (Human))					>3.50E+5
D10615	C00001235	0.5	1	0.5	Spike glycoprotein,Collagen alpha-1(I) chain	7e7d_C	CCCCCCCC\C=C/CCCCCCCC(O)=O	1	Bcl-2-like protein 11	(Homo sapiens (Human))					>3.50E+5
D10615	C00001240	0.5	1	0.5	Spike glycoprotein,Collagen alpha-1(I) chain	7e7b_A	CCCCCCCC\C=C/CCCCCCCC(O)=O	1	Bcl-2-like protein 11	(Homo sapiens (Human))					>3.50E+5
D10615	C00001240	0.5	1	0.5	Spike glycoprotein,Collagen alpha-1(I) chain	7e7b_C	CCCCCCCC\C=C/CCCCCCCC(O)=O	1	Bcl-2-like protein 11	(Homo sapiens (Human))					>3.50E+5
D10615	C00001240	0.5	1	0.5	Spike glycoprotein,Collagen alpha-1(I) chain	7e7d_A	CCCCCCCC\C=C/CCCCCCCC(O)=O	1	Bcl-2-like protein 11	(Homo sapiens (Human))					>3.50E+5
D10615	C00001240	0.5	1	0.5	Spike glycoprotein,Collagen alpha-1(I) chain	7e7d_C	CCCCCCCC\C=C/CCCCCCCC(O)=O	1	Bcl-2-like protein 11	(Homo sapiens (Human))					>3.50E+5
D10615	C00029354	0.5	1	0.5	Spike glycoprotein,Collagen alpha-1(I) chain	7e7b_A	CCCCCCCC\C=C/CCCCCCCC(O)=O	1	Bcl-2-like protein 11	(Homo sapiens (Human))					>3.50E+5
D10615	C00029354	0.5	1	0.5	Spike glycoprotein,Collagen alpha-1(I) chain	7e7b_C	CCCCCCCC\C=C/CCCCCCCC(O)=O	1	Bcl-2-like protein 11	(Homo sapiens (Human))					>3.50E+5
D10615	C00029354	0.5	1	0.5	Spike glycoprotein,Collagen alpha-1(I) chain	7e7d_A	CCCCCCCC\C=C/CCCCCCCC(O)=O	1	Bcl-2-like protein 11	(Homo sapiens (Human))					>3.50E+5
D10615	C00029354	0.5	1	0.5	Spike glycoprotein,Collagen alpha-1(I) chain	7e7d_C	CCCCCCCC\C=C/CCCCCCCC(O)=O	1	Bcl-2-like protein 11	(Homo sapiens (Human))					>3.50E+5
D10615	C00035628	0.5	1	0.5	Spike glycoprotein,Collagen alpha-1(I) chain	7e7b_A	CCCCCCCC\C=C/CCCCCCCC(O)=O	1	Bcl-2-like protein 11	(Homo sapiens (Human))					>3.50E+5
D10615	C00035628	0.5	1	0.5	Spike glycoprotein,Collagen alpha-1(I) chain	7e7b_C	CCCCCCCC\C=C/CCCCCCCC(O)=O	1	Bcl-2-like protein 11	(Homo sapiens (Human))					>3.50E+5
D10615	C00035628	0.5	1	0.5	Spike glycoprotein,Collagen alpha-1(I) chain	7e7d_A	CCCCCCCC\C=C/CCCCCCCC(O)=O	1	oo	(Homo sapiens (Human))					>3.50E+5
D10615	C00035628	0.5	1	0.5	Spike glycoprotein,Collagen alpha-1(I) chain	7e7d_C	CCCCCCCC\C=C/CCCCCCCC(O)=O	1	Bcl-2-like protein 11	(Homo sapiens (Human))					>3.50E+5
D10615	C00050972	0.5	1	0.5	Spike glycoprotein,Collagen alpha-1(I) chain	7e7b_A	CCCCCCCC\C=C/CCCCCCCC(O)=O	1	Bcl-2-like protein 11	(Homo sapiens (Human))					>3.50E+5
D10615	C00050972	0.5	1	0.5	Spike glycoprotein,Collagen alpha-1(I) chain	7e7b_C	CCCCCCCC\C=C/CCCCCCCC(O)=O	1	Bcl-2-like protein 11	(Homo sapiens (Human))					>3.50E+5
D10615	C00050972	0.5	1	0.5	Spike glycoprotein,Collagen alpha-1(I) chain	7e7d_A	CCCCCCCC\C=C/CCCCCCCC(O)=O	1	Bcl-2-like protein 11	(Homo sapiens (Human))					>3.50E+5
D10615	C00050972	0.5	1	0.5	Spike glycoprotein,Collagen alpha-1(I) chain	7e7d_C	CCCCCCCC\C=C/CCCCCCCC(O)=O	1	Bcl-2-like protein 11	(Homo sapiens (Human))					>3.50E+5
D10941	C00001849	0.5	1	0.5	Spike glycoprotein,Collagen alpha-1(I) chain	7e7b_A	CC[C@H]1CN2CCc3cc(OC)c(OC)cc3[C@@H]2C[C@@H]1C[C@H]1NCCc2cc(OC)c(OC)cc12	1	Bcl-2-like protein 11	(Homo sapiens (Human))					>3.50E+5
D10941	C00001849	0.5	1	0.5	Spike glycoprotein,Collagen alpha-1(I) chain	7e7b_C	CC[C@H]1CN2CCc3cc(OC)c(OC)cc3[C@@H]2C[C@@H]1C[C@H]1NCCc2cc(OC)c(OC)cc12	1	Bcl-2-like protein 11	(Homo sapiens (Human))					>3.50E+5
D10941	C00001849	0.5	1	0.5	Spike glycoprotein,Collagen alpha-1(I) chain	7e7d_A	CC[C@H]1CN2CCc3cc(OC)c(OC)cc3[C@@H]2C[C@@H]1C[C@H]1NCCc2cc(OC)c(OC)cc12	1	Bcl-2-like protein 11	(Homo sapiens (Human))					>3.50E+5
D10941	C00001849	0.5	1	0.5	Spike glycoprotein,Collagen alpha-1(I) chain	7e7d_C	CC[C@H]1CN2CCc3cc(OC)c(OC)cc3[C@@H]2C[C@@H]1C[C@H]1NCCc2cc(OC)c(OC)cc12	1	Bcl-2-like protein 11	(Homo sapiens (Human))					>3.50E+5
D12053	C00003218	0.5	1	0.5	Spike glycoprotein,Collagen alpha-1(I) chain	7e7b_A	C[C@@H]1C[C@@H]2OC(=O)C(=C)[C@H]2C[C@@]2(C)[C@H]1C=CC2=O	1	Bcl-2-like protein 11	(Homo sapiens (Human))					>3.50E+5
D12053	C00003218	0.5	1	0.5	Spike glycoprotein,Collagen alpha-1(I) chain	7e7b_C	C[C@@H]1C[C@@H]2OC(=O)C(=C)[C@H]2C[C@@]2(C)[C@H]1C=CC2=O	1	Bcl-2-like protein 11	(Homo sapiens (Human))					>3.50E+5
D12053	C00003218	0.5	1	0.5	Spike glycoprotein,Collagen alpha-1(I) chain	7e7d_A	C[C@@H]1C[C@@H]2OC(=O)C(=C)[C@H]2C[C@@]2(C)[C@H]1C=CC2=O	1	Bcl-2-like protein 11	(Homo sapiens (Human))					>3.50E+5
D12053	C00003218	0.5	1	0.5	Spike glycoprotein,Collagen alpha-1(I) chain	7e7d_C	C[C@@H]1C[C@@H]2OC(=O)C(=C)[C@H]2C[C@@]2(C)[C@H]1C=CC2=O	1	Bcl-2-like protein 11	(Homo sapiens (Human))					>3.50E+5
D12053	C00021143	0.5	1	0.5	Spike glycoprotein,Collagen alpha-1(I) chain	7e7b_A	C[C@@H]1C[C@@H]2OC(=O)C(=C)[C@H]2C[C@@]2(C)[C@H]1C=CC2=O	1	Bcl-2-like protein 11	(Homo sapiens (Human))					>3.50E+5
D12053	C00021143	0.5	1	0.5	Spike glycoprotein,Collagen alpha-1(I) chain	7e7b_C	C[C@@H]1C[C@@H]2OC(=O)C(=C)[C@H]2C[C@@]2(C)[C@H]1C=CC2=O	1	Bcl-2-like protein 11	(Homo sapiens (Human))					>3.50E+5
D12053	C00021143	0.5	1	0.5	Spike glycoprotein,Collagen alpha-1(I) chain	7e7d_A	C[C@@H]1C[C@@H]2OC(=O)C(=C)[C@H]2C[C@@]2(C)[C@H]1C=CC2=O	1	Bcl-2-like protein 11	(Homo sapiens (Human))					>3.50E+5
D12053	C00021143	0.5	1	0.5	Spike glycoprotein,Collagen alpha-1(I) chain	7e7d_C	C[C@@H]1C[C@@H]2OC(=O)C(=C)[C@H]2C[C@@]2(C)[C@H]1C=CC2=O	1	Bcl-2-like protein 11	(Homo sapiens (Human))					>3.50E+5
D12056	C00003211	0.5	1	0.5	Spike glycoprotein,Collagen alpha-1(I) chain	7e7b_A	C[C@@H]1C[C@H]2OC(=O)C(=C)[C@H]2[C@H](OC(C)=O)[C@@]2(C)[C@H]1C=CC2=O	1	Bcl-2-like protein 11	(Homo sapiens (Human))					>3.50E+5
D12056	C00003211	0.5	1	0.5	Spike glycoprotein,Collagen alpha-1(I) chain	7e7b_C	C[C@@H]1C[C@H]2OC(=O)C(=C)[C@H]2[C@H](OC(C)=O)[C@@]2(C)[C@H]1C=CC2=O	1	Bcl-2-like protein 11	(Homo sapiens (Human))					>3.50E+5
D12056	C00003211	0.5	1	0.5	Spike glycoprotein,Collagen alpha-1(I) chain	7e7d_A	C[C@@H]1C[C@H]2OC(=O)C(=C)[C@H]2[C@H](OC(C)=O)[C@@]2(C)[C@H]1C=CC2=O	1	Bcl-2-like protein 11	(Homo sapiens (Human))					>3.50E+5
D12056	C00003211	0.5	1	0.5	Spike glycoprotein,Collagen alpha-1(I) chain	7e7d_C	C[C@@H]1C[C@H]2OC(=O)C(=C)[C@H]2[C@H](OC(C)=O)[C@@]2(C)[C@H]1C=CC2=O	1	Bcl-2-like protein 11	(Homo sapiens (Human))					>3.50E+5
D12056	C00003318	0.5	1	0.5	Spike glycoprotein,Collagen alpha-1(I) chain	7e7b_A	C[C@@H]1C[C@H]2OC(=O)C(=C)[C@H]2[C@H](OC(C)=O)[C@@]2(C)[C@H]1C=CC2=O	1	Bcl-2-like protein 11	(Homo sapiens (Human))					>3.50E+5
D12056	C00003318	0.5	1	0.5	Spike glycoprotein,Collagen alpha-1(I) chain	7e7b_C	C[C@@H]1C[C@H]2OC(=O)C(=C)[C@H]2[C@H](OC(C)=O)[C@@]2(C)[C@H]1C=CC2=O	1	Bcl-2-like protein 11	(Homo sapiens (Human))					>3.50E+5
D12056	C00003318	0.5	1	0.5	Spike glycoprotein,Collagen alpha-1(I) chain	7e7d_A	C[C@@H]1C[C@H]2OC(=O)C(=C)[C@H]2[C@H](OC(C)=O)[C@@]2(C)[C@H]1C=CC2=O	1	Bcl-2-like protein 11	(Homo sapiens (Human))					>3.50E+5
D12056	C00003318	0.5	1	0.5	Spike glycoprotein,Collagen alpha-1(I) chain	7e7d_C	C[C@@H]1C[C@H]2OC(=O)C(=C)[C@H]2[C@H](OC(C)=O)[C@@]2(C)[C@H]1C=CC2=O	1	Bcl-2-like protein 11	(Homo sapiens (Human))					>3.50E+5
D12056	C00021118	0.5	1	0.5	Spike glycoprotein,Collagen alpha-1(I) chain	7e7b_A	C[C@@H]1C[C@H]2OC(=O)C(=C)[C@H]2[C@H](OC(C)=O)[C@@]2(C)[C@H]1C=CC2=O	1	Bcl-2-like protein 11	(Homo sapiens (Human))					>3.50E+5
D12056	C00021118	0.5	1	0.5	Spike glycoprotein,Collagen alpha-1(I) chain	7e7b_C	C[C@@H]1C[C@H]2OC(=O)C(=C)[C@H]2[C@H](OC(C)=O)[C@@]2(C)[C@H]1C=CC2=O	1	Bcl-2-like protein 11	(Homo sapiens (Human))					>3.50E+5
D12056	C00021118	0.5	1	0.5	Spike glycoprotein,Collagen alpha-1(I) chain	7e7d_A	C[C@@H]1C[C@H]2OC(=O)C(=C)[C@H]2[C@H](OC(C)=O)[C@@]2(C)[C@H]1C=CC2=O	1	Bcl-2-like protein 11	(Homo sapiens (Human))					>3.50E+5
D12056	C00021118	0.5	1	0.5	Spike glycoprotein,Collagen alpha-1(I) chain	7e7d_C	C[C@@H]1C[C@H]2OC(=O)C(=C)[C@H]2[C@H](OC(C)=O)[C@@]2(C)[C@H]1C=CC2=O	1	Bcl-2-like protein 11	(Homo sapiens (Human))					>3.50E+5
D12056	C00021120	0.5	1	0.5	Spike glycoprotein,Collagen alpha-1(I) chain	7e7b_A	C[C@@H]1C[C@H]2OC(=O)C(=C)[C@H]2[C@H](OC(C)=O)[C@@]2(C)[C@H]1C=CC2=O	1	Bcl-2-like protein 11	(Homo sapiens (Human))					>3.50E+5
D12056	C00021120	0.5	1	0.5	Spike glycoprotein,Collagen alpha-1(I) chain	7e7b_C	C[C@@H]1C[C@H]2OC(=O)C(=C)[C@H]2[C@H](OC(C)=O)[C@@]2(C)[C@H]1C=CC2=O	1	Bcl-2-like protein 11	(Homo sapiens (Human))					>3.50E+5
D12056	C00021120	0.5	1	0.5	Spike glycoprotein,Collagen alpha-1(I) chain	7e7d_A	C[C@@H]1C[C@H]2OC(=O)C(=C)[C@H]2[C@H](OC(C)=O)[C@@]2(C)[C@H]1C=CC2=O	1	Bcl-2-like protein 11	(Homo sapiens (Human))					>3.50E+5
D12056	C00021120	0.5	1	0.5	Spike glycoprotein,Collagen alpha-1(I) chain	7e7d_C	C[C@@H]1C[C@H]2OC(=O)C(=C)[C@H]2[C@H](OC(C)=O)[C@@]2(C)[C@H]1C=CC2=O	1	Bcl-2-like protein 11	(Homo sapiens (Human))					>3.50E+5
D12276	C00032703	0.5	1	0.5	Spike glycoprotein,Collagen alpha-1(I) chain	7e7b_A	C[C@H]1C[C@@H]2O[C@H]2\C=C\CC\C=C(C)\C(=O)O[C@@H](C)C[C@@H](C)[C@H](O)[C@@H](O)C(=O)C[C@@H](O)C[C@@](C)(O)\C(C)=C\C(=C)C1	1	Bcl-2-like protein 11	(Homo sapiens (Human))					>3.50E+5
D12276	C00032703	0.5	1	0.5	Spike glycoprotein,Collagen alpha-1(I) chain	7e7b_C	C[C@H]1C[C@@H]2O[C@H]2\C=C\CC\C=C(C)\C(=O)O[C@@H](C)C[C@@H](C)[C@H](O)[C@@H](O)C(=O)C[C@@H](O)C[C@@](C)(O)\C(C)=C\C(=C)C1	1	Bcl-2-like protein 11	(Homo sapiens (Human))					>3.50E+5
D12276	C00032703	0.5	1	0.5	Spike glycoprotein,Collagen alpha-1(I) chain	7e7d_A	C[C@H]1C[C@@H]2O[C@H]2\C=C\CC\C=C(C)\C(=O)O[C@@H](C)C[C@@H](C)[C@H](O)[C@@H](O)C(=O)C[C@@H](O)C[C@@](C)(O)\C(C)=C\C(=C)C1	1	Bcl-2-like protein 11	(Homo sapiens (Human))					>3.50E+5
D12276	C00032703	0.5	1	0.5	Spike glycoprotein,Collagen alpha-1(I) chain	7e7d_C	C[C@H]1C[C@@H]2O[C@H]2\C=C\CC\C=C(C)\C(=O)O[C@@H](C)C[C@@H](C)[C@H](O)[C@@H](O)C(=O)C[C@@H](O)C[C@@](C)(O)\C(C)=C\C(=C)C1	1	Bcl-2-like protein 11	(Homo sapiens (Human))					>3.50E+5
D12286	C00011307	0.5	1	0.5	Spike glycoprotein,Collagen alpha-1(I) chain	7e7b_A	C[C@H]1[C@H]2[C@H](Cc3c[nH]c4ccccc34)NC(=O)[C@@]22[C@@H](C=CC[C@H](C)C=C(C)[C@@H](O)C(=O)C=CC2=O)[C@@H]2O[C@]12C	1	Bcl-2-like protein 11	(Homo sapiens (Human))					2.16E+5
D12286	C00011307	0.5	1	0.5	Spike glycoprotein,Collagen alpha-1(I) chain	7e7b_C	C[C@H]1[C@H]2[C@H](Cc3c[nH]c4ccccc34)NC(=O)[C@@]22[C@@H](C=CC[C@H](C)C=C(C)[C@@H](O)C(=O)C=CC2=O)[C@@H]2O[C@]12C	1	Bcl-2-like protein 11	(Homo sapiens (Human))					2.16E+5
D12286	C00011307	0.5	1	0.5	Spike glycoprotein,Collagen alpha-1(I) chain	7e7d_A	C[C@H]1[C@H]2[C@H](Cc3c[nH]c4ccccc34)NC(=O)[C@@]22[C@@H](C=CC[C@H](C)C=C(C)[C@@H](O)C(=O)C=CC2=O)[C@@H]2O[C@]12C	1	Bcl-2-like protein 11	(Homo sapiens (Human))					2.16E+5
D12286	C00011307	0.5	1	0.5	Spike glycoprotein,Collagen alpha-1(I) chain	7e7d_C	C[C@H]1[C@H]2[C@H](Cc3c[nH]c4ccccc34)NC(=O)[C@@]22[C@@H](C=CC[C@H](C)C=C(C)[C@@H](O)C(=O)C=CC2=O)[C@@H]2O[C@]12C	1	Bcl-2-like protein 11	(Homo sapiens (Human))					2.16E+5
D12287	C00032469	0.5	1	0.5	Spike glycoprotein,Collagen alpha-1(I) chain	7e7b_A	C[C@]12CC[C@H]3[C@@H](CC[C@@H]4C[C@@H](O)CC[C@]34C)[C@@]1(O)CC[C@@H]2C1=CC(=O)OC1	1	Bcl-2-like protein 11	(Homo sapiens (Human))					>3.50E+5
D12287	C00032469	0.5	1	0.5	Spike glycoprotein,Collagen alpha-1(I) chain	7e7b_C	C[C@]12CC[C@H]3[C@@H](CC[C@@H]4C[C@@H](O)CC[C@]34C)[C@@]1(O)CC[C@@H]2C1=CC(=O)OC1	1	Bcl-2-like protein 11	(Homo sapiens (Human))					>3.50E+5
D12287	C00032469	0.5	1	0.5	Spike glycoprotein,Collagen alpha-1(I) chain	7e7d_A	C[C@]12CC[C@H]3[C@@H](CC[C@@H]4C[C@@H](O)CC[C@]34C)[C@@]1(O)CC[C@@H]2C1=CC(=O)OC1	1	Bcl-2-like protein 11	(Homo sapiens (Human))					>3.50E+5
D12287	C00032469	0.5	1	0.5	Spike glycoprotein,Collagen alpha-1(I) chain	7e7d_C	C[C@]12CC[C@H]3[C@@H](CC[C@@H]4C[C@@H](O)CC[C@]34C)[C@@]1(O)CC[C@@H]2C1=CC(=O)OC1	1	Bcl-2-like protein 11	(Homo sapiens (Human))					>3.50E+5
D12289	C00010979	0.5	1	0.5	Spike glycoprotein,Collagen alpha-1(I) chain	7e7b_A	C[C@]12[C@@H]3CC[C@@H](O3)[C@@]1(C)C(=O)OC2=O	1	Bcl-2-like protein 11	(Homo sapiens (Human))					>3.50E+5
D12289	C00010979	0.5	1	0.5	Spike glycoprotein,Collagen alpha-1(I) chain	7e7b_C	C[C@]12[C@@H]3CC[C@@H](O3)[C@@]1(C)C(=O)OC2=O	1	Bcl-2-like protein 11	(Homo sapiens (Human))					>3.50E+5
D12289	C00010979	0.5	1	0.5	Spike glycoprotein,Collagen alpha-1(I) chain	7e7d_A	C[C@]12[C@@H]3CC[C@@H](O3)[C@@]1(C)C(=O)OC2=O	1	Bcl-2-like protein 11	(Homo sapiens (Human))					>3.50E+5
D12289	C00010979	0.5	1	0.5	Spike glycoprotein,Collagen alpha-1(I) chain	7e7d_C	C[C@]12[C@@H]3CC[C@@H](O3)[C@@]1(C)C(=O)OC2=O	1	Bcl-2-like protein 11	(Homo sapiens (Human))					>3.50E+5
D12615	C00001736	0.5	1	0.5	Spike glycoprotein,Collagen alpha-1(I) chain	7e7b_A	Cc1nccc2c3ccccc3[nH]c12	1	Bcl-2-like protein 11	(Homo sapiens (Human))					>3.50E+5
D12615	C00001736	0.5	1	0.5	Spike glycoprotein,Collagen alpha-1(I) chain	7e7b_C	Cc1nccc2c3ccccc3[nH]c12	1	Bcl-2-like protein 11	(Homo sapiens (Human))					>3.50E+5
D12615	C00001736	0.5	1	0.5	Spike glycoprotein,Collagen alpha-1(I) chain	7e7d_A	Cc1nccc2c3ccccc3[nH]c12	1	Bcl-2-like protein 11	(Homo sapiens (Human))					>3.50E+5
D12615	C00001736	0.5	1	0.5	Spike glycoprotein,Collagen alpha-1(I) chain	7e7d_C	Cc1nccc2c3ccccc3[nH]c12	1	Bcl-2-like protein 11	(Homo sapiens (Human))					>3.50E+5
D14174	C00006925	0.5	1	0.5	Spike glycoprotein,Collagen alpha-1(I) chain	7e7b_A	Oc1ccc(\C=C\C(=O)c2ccc(O)cc2O)cc1	1	Bcl-2-like protein 11	(Homo sapiens (Human))					>3.50E+5
D14174	C00006925	0.5	1	0.5	Spike glycoprotein,Collagen alpha-1(I) chain	7e7b_C	Oc1ccc(\C=C\C(=O)c2ccc(O)cc2O)cc1	1	Bcl-2-like protein 11	(Homo sapiens (Human))					>3.50E+5
D14174	C00006925	0.5	1	0.5	Spike glycoprotein,Collagen alpha-1(I) chain	7e7d_A	Oc1ccc(\C=C\C(=O)c2ccc(O)cc2O)cc1	1	Bcl-2-like protein 11	(Homo sapiens (Human))					>3.50E+5
D14174	C00006925	0.5	1	0.5	Spike glycoprotein,Collagen alpha-1(I) chain	7e7d_C	Oc1ccc(\C=C\C(=O)c2ccc(O)cc2O)cc1	1	Bcl-2-like protein 11	(Homo sapiens (Human))					>3.50E+5
D14174	C00035173	0.5	1	0.5	Spike glycoprotein,Collagen alpha-1(I) chain	7e7b_A	Oc1ccc(\C=C\C(=O)c2ccc(O)cc2O)cc1	1	Bcl-2-like protein 11	(Homo sapiens (Human))					>3.50E+5
D14174	C00035173	0.5	1	0.5	Spike glycoprotein,Collagen alpha-1(I) chain	7e7b_C	Oc1ccc(\C=C\C(=O)c2ccc(O)cc2O)cc1	1	Bcl-2-like protein 11	(Homo sapiens (Human))					>3.50E+5
D14174	C00035173	0.5	1	0.5	Spike glycoprotein,Collagen alpha-1(I) chain	7e7d_A	Oc1ccc(\C=C\C(=O)c2ccc(O)cc2O)cc1	1	Bcl-2-like protein 11	(Homo sapiens (Human))					>3.50E+5
D14174	C00035173	0.5	1	0.5	Spike glycoprotein,Collagen alpha-1(I) chain	7e7d_C	Oc1ccc(\C=C\C(=O)c2ccc(O)cc2O)cc1	1	Bcl-2-like protein 11	(Homo sapiens (Human))					>3.50E+5
D10607	C00031853	0.5	0.958333	0.479167	Spike glycoprotein,Collagen alpha-1(I) chain	7e7b_A	CCCCCC(=O)N1CCCC1	1	Bcl-2-like protein 11	(Homo sapiens (Human))					>3.50E+5
D10607	C00031853	0.5	0.958333	0.479167	Spike glycoprotein,Collagen alpha-1(I) chain	7e7b_C	CCCCCC(=O)N1CCCC1	1	Bcl-2-like protein 11	(Homo sapiens (Human))					>3.50E+5
D10607	C00031853	0.5	0.958333	0.479167	Spike glycoprotein,Collagen alpha-1(I) chain	7e7d_A	CCCCCC(=O)N1CCCC1	1	Bcl-2-like protein 11	(Homo sapiens (Human))					>3.50E+5
D10607	C00031853	0.5	0.958333	0.479167	Spike glycoprotein,Collagen alpha-1(I) chain	7e7d_C	CCCCCC(=O)N1CCCC1	1	Bcl-2-like protein 11	(Homo sapiens (Human))					>3.50E+5
D10615	C00001229	0.5	0.916667	0.458333	Spike glycoprotein,Collagen alpha-1(I) chain	7e7b_A	CCCCCCCC\C=C/CCCCCCCC(O)=O	1	Bcl-2-like protein 11	(Homo sapiens (Human))					>3.50E+5
D10615	C00001229	0.5	0.916667	0.458333	Spike glycoprotein,Collagen alpha-1(I) chain	7e7b_C	CCCCCCCC\C=C/CCCCCCCC(O)=O	1	Bcl-2-like protein 11	(Homo sapiens (Human))					>3.50E+5
D10615	C00001229	0.5	0.916667	0.458333	Spike glycoprotein,Collagen alpha-1(I) chain	7e7d_A	CCCCCCCC\C=C/CCCCCCCC(O)=O	1	Bcl-2-like protein 11	(Homo sapiens (Human))					>3.50E+5
D10615	C00001229	0.5	0.916667	0.458333	Spike glycoprotein,Collagen alpha-1(I) chain	7e7d_C	CCCCCCCC\C=C/CCCCCCCC(O)=O	1	Bcl-2-like protein 11	(Homo sapiens (Human))					>3.50E+5
D10615	C00007424	0.5	0.916667	0.458333	Spike glycoprotein,Collagen alpha-1(I) chain	7e7b_A	CCCCCCCC\C=C/CCCCCCCC(O)=O	1	Bcl-2-like protein 11	(Homo sapiens (Human))					>3.50E+5
D10615	C00007424	0.5	0.916667	0.458333	Spike glycoprotein,Collagen alpha-1(I) chain	7e7b_C	CCCCCCCC\C=C/CCCCCCCC(O)=O	1	Bcl-2-like protein 11	(Homo sapiens (Human))					>3.50E+5
D10615	C00007424	0.5	0.916667	0.458333	Spike glycoprotein,Collagen alpha-1(I) chain	7e7d_A	CCCCCCCC\C=C/CCCCCCCC(O)=O	1	Bcl-2-like protein 11	(Homo sapiens (Human))					>3.50E+5
D10615	C00007424	0.5	0.916667	0.458333	Spike glycoprotein,Collagen alpha-1(I) chain	7e7d_C	CCCCCCCC\C=C/CCCCCCCC(O)=O	1	Bcl-2-like protein 11	(Homo sapiens (Human))					>3.50E+5
D10941	C00001835	0.5	0.890909	0.445455	Spike glycoprotein,Collagen alpha-1(I) chain	7e7b_A	CC[C@H]1CN2CCc3cc(OC)c(OC)cc3[C@@H]2C[C@@H]1C[C@H]1NCCc2cc(OC)c(OC)cc12	1	Bcl-2-like protein 11	(Homo sapiens (Human))					>3.50E+5
D10941	C00001835	0.5	0.890909	0.445455	Spike glycoprotein,Collagen alpha-1(I) chain	7e7b_C	CC[C@H]1CN2CCc3cc(OC)c(OC)cc3[C@@H]2C[C@@H]1C[C@H]1NCCc2cc(OC)c(OC)cc12	1	Bcl-2-like protein 11	(Homo sapiens (Human))					>3.50E+5
D10941	C00001835	0.5	0.890909	0.445455	Spike glycoprotein,Collagen alpha-1(I) chain	7e7d_A	CC[C@H]1CN2CCc3cc(OC)c(OC)cc3[C@@H]2C[C@@H]1C[C@H]1NCCc2cc(OC)c(OC)cc12	1	Bcl-2-like protein 11	(Homo sapiens (Human))					>3.50E+5
D10941	C00001835	0.5	0.890909	0.445455	Spike glycoprotein,Collagen alpha-1(I) chain	7e7d_C	CC[C@H]1CN2CCc3cc(OC)c(OC)cc3[C@@H]2C[C@@H]1C[C@H]1NCCc2cc(OC)c(OC)cc12	1	Bcl-2-like protein 11	(Homo sapiens (Human))					>3.50E+5
D10941	C00027384	0.5	0.890909	0.445455	Spike glycoprotein,Collagen alpha-1(I) chain	7e7b_A	CC[C@H]1CN2CCc3cc(OC)c(OC)cc3[C@@H]2C[C@@H]1C[C@H]1NCCc2cc(OC)c(OC)cc12	1	Bcl-2-like protein 11	(Homo sapiens (Human))					>3.50E+5
D10941	C00027384	0.5	0.890909	0.445455	Spike glycoprotein,Collagen alpha-1(I) chain	7e7b_C	CC[C@H]1CN2CCc3cc(OC)c(OC)cc3[C@@H]2C[C@@H]1C[C@H]1NCCc2cc(OC)c(OC)cc12	1	Bcl-2-like protein 11	(Homo sapiens (Human))					>3.50E+5
D10941	C00027384	0.5	0.890909	0.445455	Spike glycoprotein,Collagen alpha-1(I) chain	7e7d_A	CC[C@H]1CN2CCc3cc(OC)c(OC)cc3[C@@H]2C[C@@H]1C[C@H]1NCCc2cc(OC)c(OC)cc12	1	Bcl-2-like protein 11	(Homo sapiens (Human))					>3.50E+5
D10941	C00027384	0.5	0.890909	0.445455	Spike glycoprotein,Collagen alpha-1(I) chain	7e7d_C	CC[C@H]1CN2CCc3cc(OC)c(OC)cc3[C@@H]2C[C@@H]1C[C@H]1NCCc2cc(OC)c(OC)cc12	1	Bcl-2-like protein 11	(Homo sapiens (Human))					>3.50E+5
D10941	C00038322	0.5	0.890909	0.445455	Spike glycoprotein,Collagen alpha-1(I) chain	7e7b_A	CC[C@H]1CN2CCc3cc(OC)c(OC)cc3[C@@H]2C[C@@H]1C[C@H]1NCCc2cc(OC)c(OC)cc12	1	Bcl-2-like protein 11	(Homo sapiens (Human))					>3.50E+5
D10941	C00038322	0.5	0.890909	0.445455	Spike glycoprotein,Collagen alpha-1(I) chain	7e7b_C	CC[C@H]1CN2CCc3cc(OC)c(OC)cc3[C@@H]2C[C@@H]1C[C@H]1NCCc2cc(OC)c(OC)cc12	1	Bcl-2-like protein 11	(Homo sapiens (Human))					>3.50E+5
D10941	C00038322	0.5	0.890909	0.445455	Spike glycoprotein,Collagen alpha-1(I) chain	7e7d_A	CC[C@H]1CN2CCc3cc(OC)c(OC)cc3[C@@H]2C[C@@H]1C[C@H]1NCCc2cc(OC)c(OC)cc12	1	Bcl-2-like protein 11	(Homo sapiens (Human))					>3.50E+5
D10941	C00038322	0.5	0.890909	0.445455	Spike glycoprotein,Collagen alpha-1(I) chain	7e7d_C	CC[C@H]1CN2CCc3cc(OC)c(OC)cc3[C@@H]2C[C@@H]1C[C@H]1NCCc2cc(OC)c(OC)cc12	1	Bcl-2-like protein 11	(Homo sapiens (Human))					>3.50E+5
D10941	C00044486	0.5	0.890909	0.445455	Spike glycoprotein,Collagen alpha-1(I) chain	7e7b_A	CC[C@H]1CN2CCc3cc(OC)c(OC)cc3[C@@H]2C[C@@H]1C[C@H]1NCCc2cc(OC)c(OC)cc12	1	Bcl-2-like protein 11	(Homo sapiens (Human))					>3.50E+5
D10941	C00044486	0.5	0.890909	0.445455	Spike glycoprotein,Collagen alpha-1(I) chain	7e7b_C	CC[C@H]1CN2CCc3cc(OC)c(OC)cc3[C@@H]2C[C@@H]1C[C@H]1NCCc2cc(OC)c(OC)cc12	1	Bcl-2-like protein 11	(Homo sapiens (Human))					>3.50E+5
D10941	C00044486	0.5	0.890909	0.445455	Spike glycoprotein,Collagen alpha-1(I) chain	7e7d_A	CC[C@H]1CN2CCc3cc(OC)c(OC)cc3[C@@H]2C[C@@H]1C[C@H]1NCCc2cc(OC)c(OC)cc12	1	Bcl-2-like protein 11	(Homo sapiens (Human))					>3.50E+5
D10941	C00044486	0.5	0.890909	0.445455	Spike glycoprotein,Collagen alpha-1(I) chain	7e7d_C	CC[C@H]1CN2CCc3cc(OC)c(OC)cc3[C@@H]2C[C@@H]1C[C@H]1NCCc2cc(OC)c(OC)cc12	1	Bcl-2-like protein 11	(Homo sapiens (Human))					>3.50E+5
D10615	C00001224	0.5	0.884615	0.442308	Spike glycoprotein,Collagen alpha-1(I) chain	7e7b_A	CCCCCCCC\C=C/CCCCCCCC(O)=O	1	Bcl-2-like protein 11	(Homo sapiens (Human))					>3.50E+5
D10615	C00001224	0.5	0.884615	0.442308	Spike glycoprotein,Collagen alpha-1(I) chain	7e7b_C	CCCCCCCC\C=C/CCCCCCCC(O)=O	1	Bcl-2-like protein 11	(Homo sapiens (Human))					>3.50E+5
D10615	C00001224	0.5	0.884615	0.442308	Spike glycoprotein,Collagen alpha-1(I) chain	7e7d_A	CCCCCCCC\C=C/CCCCCCCC(O)=O	1	Bcl-2-like protein 11	(Homo sapiens (Human))					>3.50E+5
D10615	C00001224	0.5	0.884615	0.442308	Spike glycoprotein,Collagen alpha-1(I) chain	7e7d_C	CCCCCCCC\C=C/CCCCCCCC(O)=O	1	Bcl-2-like protein 11	(Homo sapiens (Human))					>3.50E+5
D10615	C00036669	0.5	0.884615	0.442308	Spike glycoprotein,Collagen alpha-1(I) chain	7e7b_A	CCCCCCCC\C=C/CCCCCCCC(O)=O	1	Bcl-2-like protein 11	(Homo sapiens (Human))					>3.50E+5
D10615	C00036669	0.5	0.884615	0.442308	Spike glycoprotein,Collagen alpha-1(I) chain	7e7b_C	CCCCCCCC\C=C/CCCCCCCC(O)=O	1	Bcl-2-like protein 11	(Homo sapiens (Human))					>3.50E+5
D10615	C00036669	0.5	0.884615	0.442308	Spike glycoprotein,Collagen alpha-1(I) chain	7e7d_A	CCCCCCCC\C=C/CCCCCCCC(O)=O	1	Bcl-2-like protein 11	(Homo sapiens (Human))					>3.50E+5
D10615	C00036669	0.5	0.884615	0.442308	Spike glycoprotein,Collagen alpha-1(I) chain	7e7d_C	CCCCCCCC\C=C/CCCCCCCC(O)=O	1	Bcl-2-like protein 11	(Homo sapiens (Human))					>3.50E+5
D10393	C00039897	0.5	0.88	0.44	Spike glycoprotein,Collagen alpha-1(I) chain	7e7b_A	CC(CC(O)[C@H]1O[C@@H]2CC[C@@]3(CC[C@@H](O3)\C=C\C(C)[C@@H]3CC(C)=CC4(O[C@H](C[C@@](C)(O)CO)CCC4O)O3)O[C@H]2C(O)C1=C)[C@H]1OC2(CCCCO2)CCC1C	1	Bcl-2-like protein 11	(Homo sapiens (Human))					>3.50E+5
D10393	C00039897	0.5	0.88	0.44	Spike glycoprotein,Collagen alpha-1(I) chain	7e7b_C	CC(CC(O)[C@H]1O[C@@H]2CC[C@@]3(CC[C@@H](O3)\C=C\C(C)[C@@H]3CC(C)=CC4(O[C@H](C[C@@](C)(O)CO)CCC4O)O3)O[C@H]2C(O)C1=C)[C@H]1OC2(CCCCO2)CCC1C	1	Bcl-2-like protein 11	(Homo sapiens (Human))					>3.50E+5
D10393	C00039897	0.5	0.88	0.44	Spike glycoprotein,Collagen alpha-1(I) chain	7e7d_A	CC(CC(O)[C@H]1O[C@@H]2CC[C@@]3(CC[C@@H](O3)\C=C\C(C)[C@@H]3CC(C)=CC4(O[C@H](C[C@@](C)(O)CO)CCC4O)O3)O[C@H]2C(O)C1=C)[C@H]1OC2(CCCCO2)CCC1C	1	Bcl-2-like protein 11	(Homo sapiens (Human))					>3.50E+5
D10393	C00039897	0.5	0.88	0.44	Spike glycoprotein,Collagen alpha-1(I) chain	7e7d_C	CC(CC(O)[C@H]1O[C@@H]2CC[C@@]3(CC[C@@H](O3)\C=C\C(C)[C@@H]3CC(C)=CC4(O[C@H](C[C@@](C)(O)CO)CCC4O)O3)O[C@H]2C(O)C1=C)[C@H]1OC2(CCCCO2)CCC1C	1	Bcl-2-like protein 11	(Homo sapiens (Human))					>3.50E+5
D10941	C00027245	0.5	0.857143	0.428571	Spike glycoprotein,Collagen alpha-1(I) chain	7e7b_A	CC[C@H]1CN2CCc3cc(OC)c(OC)cc3[C@@H]2C[C@@H]1C[C@H]1NCCc2cc(OC)c(OC)cc12	1	Bcl-2-like protein 11	(Homo sapiens (Human))					>3.50E+5
D10941	C00027245	0.5	0.857143	0.428571	Spike glycoprotein,Collagen alpha-1(I) chain	7e7b_C	CC[C@H]1CN2CCc3cc(OC)c(OC)cc3[C@@H]2C[C@@H]1C[C@H]1NCCc2cc(OC)c(OC)cc12	1	Bcl-2-like protein 11	(Homo sapiens (Human))					>3.50E+5
D10941	C00027245	0.5	0.857143	0.428571	Spike glycoprotein,Collagen alpha-1(I) chain	7e7d_A	CC[C@H]1CN2CCc3cc(OC)c(OC)cc3[C@@H]2C[C@@H]1C[C@H]1NCCc2cc(OC)c(OC)cc12	1	Bcl-2-like protein 11	(Homo sapiens (Human))					>3.50E+5
D10941	C00027245	0.5	0.857143	0.428571	Spike glycoprotein,Collagen alpha-1(I) chain	7e7d_C	CC[C@H]1CN2CCc3cc(OC)c(OC)cc3[C@@H]2C[C@@H]1C[C@H]1NCCc2cc(OC)c(OC)cc12	1	Bcl-2-like protein 11	(Homo sapiens (Human))					>3.50E+5
D10941	C00051992	0.5	0.854545	0.427273	Spike glycoprotein,Collagen alpha-1(I) chain	7e7b_A	CC[C@H]1CN2CCc3cc(OC)c(OC)cc3[C@@H]2C[C@@H]1C[C@H]1NCCc2cc(OC)c(OC)cc12	1	Bcl-2-like protein 11	(Homo sapiens (Human))					>3.50E+5
D10941	C00051992	0.5	0.854545	0.427273	Spike glycoprotein,Collagen alpha-1(I) chain	7e7b_C	CC[C@H]1CN2CCc3cc(OC)c(OC)cc3[C@@H]2C[C@@H]1C[C@H]1NCCc2cc(OC)c(OC)cc12	1	Bcl-2-like protein 11	(Homo sapiens (Human))					>3.50E+5
D10941	C00051992	0.5	0.854545	0.427273	Spike glycoprotein,Collagen alpha-1(I) chain	7e7d_A	CC[C@H]1CN2CCc3cc(OC)c(OC)cc3[C@@H]2C[C@@H]1C[C@H]1NCCc2cc(OC)c(OC)cc12	1	Bcl-2-like protein 11	(Homo sapiens (Human))					>3.50E+5
D10941	C00051992	0.5	0.854545	0.427273	Spike glycoprotein,Collagen alpha-1(I) chain	7e7d_C	CC[C@H]1CN2CCc3cc(OC)c(OC)cc3[C@@H]2C[C@@H]1C[C@H]1NCCc2cc(OC)c(OC)cc12	1	Bcl-2-like protein 11	(Homo sapiens (Human))					>3.50E+5
D10328	C00031597	0.3	1	0.3	Spike glycoprotein	6zox_A	CC(C)[C@@H]1NC(=O)[C@@H](CCCCNC(=O)[C@H](Cc2ccccc2)NC(=O)[C@H](C)N(C)C(=O)[C@H](CCc2ccc(O)cc2)NC1=O)NC(=O)N[C@@H](CCCNC(N)=N)C(O)=O	1	Carboxypeptidase B2 isoform A	(Homo sapiens (Human))			1.5
D10328	C00031597	0.3	1	0.3	Spike glycoprotein	6zox_C	CC(C)[C@@H]1NC(=O)[C@@H](CCCCNC(=O)[C@H](Cc2ccccc2)NC(=O)[C@H](C)N(C)C(=O)[C@H](CCc2ccc(O)cc2)NC1=O)NC(=O)N[C@@H](CCCNC(N)=N)C(O)=O	1	Carboxypeptidase B2 isoform A	(Homo sapiens (Human))			1.5
D10328	C00031597	0.3	1	0.3	Spike glycoprotein	6zp0_A	CC(C)[C@@H]1NC(=O)[C@@H](CCCCNC(=O)[C@H](Cc2ccccc2)NC(=O)[C@H](C)N(C)C(=O)[C@H](CCc2ccc(O)cc2)NC1=O)NC(=O)N[C@@H](CCCNC(N)=N)C(O)=O	1	Carboxypeptidase B2 isoform A	(Homo sapiens (Human))			1.5
D10328	C00031597	0.3	1	0.3	Spike glycoprotein	6zp0_C	CC(C)[C@@H]1NC(=O)[C@@H](CCCCNC(=O)[C@H](Cc2ccccc2)NC(=O)[C@H](C)N(C)C(=O)[C@H](CCc2ccc(O)cc2)NC1=O)NC(=O)N[C@@H](CCCNC(N)=N)C(O)=O	1	Carboxypeptidase B2 isoform A	(Homo sapiens (Human))			1.5
D10924	C00028778	0.3	1	0.3	Spike glycoprotein	6zox_A	CC[C@@H](C)[C@@H]1NC(=O)[C@@H](CCCCNC(=O)[C@H](Cc2ccccc2)NC(=O)[C@H](C)N(C)C(=O)[C@H](CCc2ccc(O)cc2)NC1=O)NC(=O)N[C@@H](Cc1ccc(O)cc1)C(O)=O	1	Carboxypeptidase B2 isoform A	(Homo sapiens (Human))			400
D10924	C00028778	0.3	1	0.3	Spike glycoprotein	6zox_C	CC[C@@H](C)[C@@H]1NC(=O)[C@@H](CCCCNC(=O)[C@H](Cc2ccccc2)NC(=O)[C@H](C)N(C)C(=O)[C@H](CCc2ccc(O)cc2)NC1=O)NC(=O)N[C@@H](Cc1ccc(O)cc1)C(O)=O	1	Carboxypeptidase B2 isoform A	(Homo sapiens (Human))			400
D10924	C00028778	0.3	1	0.3	Spike glycoprotein	6zp0_A	CC[C@@H](C)[C@@H]1NC(=O)[C@@H](CCCCNC(=O)[C@H](Cc2ccccc2)NC(=O)[C@H](C)N(C)C(=O)[C@H](CCc2ccc(O)cc2)NC1=O)NC(=O)N[C@@H](Cc1ccc(O)cc1)C(O)=O	1	Carboxypeptidase B2 isoform A	(Homo sapiens (Human))			400
D10924	C00028778	0.3	1	0.3	Spike glycoprotein	6zp0_C	CC[C@@H](C)[C@@H]1NC(=O)[C@@H](CCCCNC(=O)[C@H](Cc2ccccc2)NC(=O)[C@H](C)N(C)C(=O)[C@H](CCc2ccc(O)cc2)NC1=O)NC(=O)N[C@@H](Cc1ccc(O)cc1)C(O)=O	1	Carboxypeptidase B2 isoform A	(Homo sapiens (Human))			400
D10930	C00027845	0.3	1	0.3	Spike glycoprotein	6zox_A	CC[C@H](C)[C@@H]1NC(=O)[C@@H](CCCCNC(=O)[C@H](Cc2ccccc2)NC(=O)[C@H](C)N(C)C(=O)[C@H](CCc2ccc(O)cc2)NC1=O)NC(=O)N[C@@H](CCCNC(N)=N)C(O)=O	1	Carboxypeptidase B2 isoform A	(Homo sapiens (Human))			1.5
D10930	C00027845	0.3	1	0.3	Spike glycoprotein	6zox_C	CC[C@H](C)[C@@H]1NC(=O)[C@@H](CCCCNC(=O)[C@H](Cc2ccccc2)NC(=O)[C@H](C)N(C)C(=O)[C@H](CCc2ccc(O)cc2)NC1=O)NC(=O)N[C@@H](CCCNC(N)=N)C(O)=O	1	Carboxypeptidase B2 isoform A	(Homo sapiens (Human))			1.5
D10930	C00027845	0.3	1	0.3	Spike glycoprotein	6zp0_A	CC[C@H](C)[C@@H]1NC(=O)[C@@H](CCCCNC(=O)[C@H](Cc2ccccc2)NC(=O)[C@H](C)N(C)C(=O)[C@H](CCc2ccc(O)cc2)NC1=O)NC(=O)N[C@@H](CCCNC(N)=N)C(O)=O	1	Carboxypeptidase B2 isoform A	(Homo sapiens (Human))			1.5
D10930	C00027845	0.3	1	0.3	Spike glycoprotein	6zp0_C	CC[C@H](C)[C@@H]1NC(=O)[C@@H](CCCCNC(=O)[C@H](Cc2ccccc2)NC(=O)[C@H](C)N(C)C(=O)[C@H](CCc2ccc(O)cc2)NC1=O)NC(=O)N[C@@H](CCCNC(N)=N)C(O)=O	1	Carboxypeptidase B2 isoform A	(Homo sapiens (Human))			1.5
D10930	C00046254	0.3	0.914894	0.274468	Spike glycoprotein	6zox_A	CC[C@H](C)[C@@H]1NC(=O)[C@@H](CCCCNC(=O)[C@H](Cc2ccccc2)NC(=O)[C@H](C)N(C)C(=O)[C@H](CCc2ccc(O)cc2)NC1=O)NC(=O)N[C@@H](CCCNC(N)=N)C(O)=O	1	Carboxypeptidase B2 isoform A	(Homo sapiens (Human))			1.5
D10930	C00046254	0.3	0.914894	0.274468	Spike glycoprotein	6zox_C	CC[C@H](C)[C@@H]1NC(=O)[C@@H](CCCCNC(=O)[C@H](Cc2ccccc2)NC(=O)[C@H](C)N(C)C(=O)[C@H](CCc2ccc(O)cc2)NC1=O)NC(=O)N[C@@H](CCCNC(N)=N)C(O)=O	1	Carboxypeptidase B2 isoform A	(Homo sapiens (Human))			1.5
D10930	C00046254	0.3	0.914894	0.274468	Spike glycoprotein	6zp0_A	CC[C@H](C)[C@@H]1NC(=O)[C@@H](CCCCNC(=O)[C@H](Cc2ccccc2)NC(=O)[C@H](C)N(C)C(=O)[C@H](CCc2ccc(O)cc2)NC1=O)NC(=O)N[C@@H](CCCNC(N)=N)C(O)=O	1	Carboxypeptidase B2 isoform A	(Homo sapiens (Human))			1.5
D10930	C00046254	0.3	0.914894	0.274468	Spike glycoprotein	6zp0_C	CC[C@H](C)[C@@H]1NC(=O)[C@@H](CCCCNC(=O)[C@H](Cc2ccccc2)NC(=O)[C@H](C)N(C)C(=O)[C@H](CCc2ccc(O)cc2)NC1=O)NC(=O)N[C@@H](CCCNC(N)=N)C(O)=O	1	Carboxypeptidase B2 isoform A	(Homo sapiens (Human))			1.5
D10328	C00027845	0.3	0.913978	0.274194	Spike glycoprotein	6zox_A	CC(C)[C@@H]1NC(=O)[C@@H](CCCCNC(=O)[C@H](Cc2ccccc2)NC(=O)[C@H](C)N(C)C(=O)[C@H](CCc2ccc(O)cc2)NC1=O)NC(=O)N[C@@H](CCCNC(N)=N)C(O)=O	1	Carboxypeptidase B2 isoform A	(Homo sapiens (Human))			1.5
D10328	C00027845	0.3	0.913978	0.274194	Spike glycoprotein	6zox_C	CC(C)[C@@H]1NC(=O)[C@@H](CCCCNC(=O)[C@H](Cc2ccccc2)NC(=O)[C@H](C)N(C)C(=O)[C@H](CCc2ccc(O)cc2)NC1=O)NC(=O)N[C@@H](CCCNC(N)=N)C(O)=O	1	Carboxypeptidase B2 isoform A	(Homo sapiens (Human))			1.5
D10328	C00027845	0.3	0.913978	0.274194	Spike glycoprotein	6zp0_A	CC(C)[C@@H]1NC(=O)[C@@H](CCCCNC(=O)[C@H](Cc2ccccc2)NC(=O)[C@H](C)N(C)C(=O)[C@H](CCc2ccc(O)cc2)NC1=O)NC(=O)N[C@@H](CCCNC(N)=N)C(O)=O	1	Carboxypeptidase B2 isoform A	(Homo sapiens (Human))			1.5
D10328	C00027845	0.3	0.913978	0.274194	Spike glycoprotein	6zp0_C	CC(C)[C@@H]1NC(=O)[C@@H](CCCCNC(=O)[C@H](Cc2ccccc2)NC(=O)[C@H](C)N(C)C(=O)[C@H](CCc2ccc(O)cc2)NC1=O)NC(=O)N[C@@H](CCCNC(N)=N)C(O)=O	1	Carboxypeptidase B2 isoform A	(Homo sapiens (Human))			1.5
D10930	C00031597	0.3	0.913978	0.274194	Spike glycoprotein	6zox_A	CC[C@H](C)[C@@H]1NC(=O)[C@@H](CCCCNC(=O)[C@H](Cc2ccccc2)NC(=O)[C@H](C)N(C)C(=O)[C@H](CCc2ccc(O)cc2)NC1=O)NC(=O)N[C@@H](CCCNC(N)=N)C(O)=O	1	Carboxypeptidase B2 isoform A	(Homo sapiens (Human))			1.5
D10930	C00031597	0.3	0.913978	0.274194	Spike glycoprotein	6zox_C	CC[C@H](C)[C@@H]1NC(=O)[C@@H](CCCCNC(=O)[C@H](Cc2ccccc2)NC(=O)[C@H](C)N(C)C(=O)[C@H](CCc2ccc(O)cc2)NC1=O)NC(=O)N[C@@H](CCCNC(N)=N)C(O)=O	1	Carboxypeptidase B2 isoform A	(Homo sapiens (Human))			1.5
D10930	C00031597	0.3	0.913978	0.274194	Spike glycoprotein	6zp0_A	CC[C@H](C)[C@@H]1NC(=O)[C@@H](CCCCNC(=O)[C@H](Cc2ccccc2)NC(=O)[C@H](C)N(C)C(=O)[C@H](CCc2ccc(O)cc2)NC1=O)NC(=O)N[C@@H](CCCNC(N)=N)C(O)=O	1	Carboxypeptidase B2 isoform A	(Homo sapiens (Human))			1.5
D10930	C00031597	0.3	0.913978	0.274194	Spike glycoprotein	6zp0_C	CC[C@H](C)[C@@H]1NC(=O)[C@@H](CCCCNC(=O)[C@H](Cc2ccccc2)NC(=O)[C@H](C)N(C)C(=O)[C@H](CCc2ccc(O)cc2)NC1=O)NC(=O)N[C@@H](CCCNC(N)=N)C(O)=O	1	Carboxypeptidase B2 isoform A	(Homo sapiens (Human))			1.5
D10930	C00027846	0.3	0.893617	0.268085	Spike glycoprotein	6zox_A	CC[C@H](C)[C@@H]1NC(=O)[C@@H](CCCCNC(=O)[C@H](Cc2ccccc2)NC(=O)[C@H](C)N(C)C(=O)[C@H](CCc2ccc(O)cc2)NC1=O)NC(=O)N[C@@H](CCCNC(N)=N)C(O)=O	1	Carboxypeptidase B2 isoform A	(Homo sapiens (Human))			1.5
D10930	C00027846	0.3	0.893617	0.268085	Spike glycoprotein	6zox_C	CC[C@H](C)[C@@H]1NC(=O)[C@@H](CCCCNC(=O)[C@H](Cc2ccccc2)NC(=O)[C@H](C)N(C)C(=O)[C@H](CCc2ccc(O)cc2)NC1=O)NC(=O)N[C@@H](CCCNC(N)=N)C(O)=O	1	Carboxypeptidase B2 isoform A	(Homo sapiens (Human))			1.5
D10930	C00027846	0.3	0.893617	0.268085	Spike glycoprotein	6zp0_A	CC[C@H](C)[C@@H]1NC(=O)[C@@H](CCCCNC(=O)[C@H](Cc2ccccc2)NC(=O)[C@H](C)N(C)C(=O)[C@H](CCc2ccc(O)cc2)NC1=O)NC(=O)N[C@@H](CCCNC(N)=N)C(O)=O	1	Carboxypeptidase B2 isoform A	(Homo sapiens (Human))			1.5
D10930	C00027846	0.3	0.893617	0.268085	Spike glycoprotein	6zp0_C	CC[C@H](C)[C@@H]1NC(=O)[C@@H](CCCCNC(=O)[C@H](Cc2ccccc2)NC(=O)[C@H](C)N(C)C(=O)[C@H](CCc2ccc(O)cc2)NC1=O)NC(=O)N[C@@H](CCCNC(N)=N)C(O)=O	1	Carboxypeptidase B2 isoform A	(Homo sapiens (Human))			1.5
D11314	C00027138	0.5	1	0.5	Spike protein S1	7nxa_C	CN[C@H]1CCc2cc(OC)c(OC)c(OC)c2-c2ccc(OC)c(=O)cc12	2	nuclear receptor coactivator 3 isoform a	(Homo sapiens (Human))			>3.59E+4
D11314	C00027138	0.5	1	0.5	Spike protein S1	7e8m_A	CN[C@H]1CCc2cc(OC)c(OC)c(OC)c2-c2ccc(OC)c(=O)cc12	2	nuclear receptor coactivator 3 isoform a	(Homo sapiens (Human))			>3.59E+4
D11314	C00027138	0.5	1	0.5	Spike protein S1	7nxc_B	CN[C@H]1CCc2cc(OC)c(OC)c(OC)c2-c2ccc(OC)c(=O)cc12	2	nuclear receptor coactivator 3 isoform a	(Homo sapiens (Human))			>3.59E+4
D11314	C00027138	0.5	1	0.5	Spike protein S1	7nxb_C	CN[C@H]1CCc2cc(OC)c(OC)c(OC)c2-c2ccc(OC)c(=O)cc12	2	nuclear receptor coactivator 3 isoform a	(Homo sapiens (Human))			>3.59E+4
D11314	C00027138	0.5	1	0.5	Spike protein S1	7nx9_C	CN[C@H]1CCc2cc(OC)c(OC)c(OC)c2-c2ccc(OC)c(=O)cc12	2	nuclear receptor coactivator 3 isoform a	(Homo sapiens (Human))			>3.59E+4
D11623	C00015542	0.5	1	0.5	Spike protein S1	7nxa_C	COc1cc2c(ccc3cc(OC)c(OC)c(O)c23)cc1O	2	nuclear receptor coactivator 3 isoform a	(Homo sapiens (Human))			2.67E+4
D11623	C00015542	0.5	1	0.5	Spike protein S1	7e8m_A	COc1cc2c(ccc3cc(OC)c(OC)c(O)c23)cc1O	2	nuclear receptor coactivator 3 isoform a	(Homo sapiens (Human))			2.67E+4
D11623	C00015542	0.5	1	0.5	Spike protein S1	7nxc_B	COc1cc2c(ccc3cc(OC)c(OC)c(O)c23)cc1O	2	nuclear receptor coactivator 3 isoform a	(Homo sapiens (Human))			2.67E+4
D11623	C00015542	0.5	1	0.5	Spike protein S1	7nxb_C	COc1cc2c(ccc3cc(OC)c(OC)c(O)c23)cc1O	2	nuclear receptor coactivator 3 isoform a	(Homo sapiens (Human))			2.67E+4
D11623	C00015542	0.5	1	0.5	Spike protein S1	7nx9_C	COc1cc2c(ccc3cc(OC)c(OC)c(O)c23)cc1O	2	nuclear receptor coactivator 3 isoform a	(Homo sapiens (Human))			2.67E+4
D13529	C00042440	0.5	1	0.5	Spike protein S1	7nxa_C	Nc1ccn([C@@H]2O[C@H](CO)[C@@H](O)[C@@H]2O)c(=O)n1	2	nuclear receptor coactivator 3 isoform a	(Homo sapiens (Human))			7.53E+3
D13529	C00042440	0.5	1	0.5	Spike protein S1	7e8m_A	Nc1ccn([C@@H]2O[C@H](CO)[C@@H](O)[C@@H]2O)c(=O)n1	2	nuclear receptor coactivator 3 isoform a	(Homo sapiens (Human))			7.53E+3
D13529	C00042440	0.5	1	0.5	Spike protein S1	7nxc_B	Nc1ccn([C@@H]2O[C@H](CO)[C@@H](O)[C@@H]2O)c(=O)n1	2	nuclear receptor coactivator 3 isoform a	(Homo sapiens (Human))			7.53E+3
D13529	C00042440	0.5	1	0.5	Spike protein S1	7nxb_C	Nc1ccn([C@@H]2O[C@H](CO)[C@@H](O)[C@@H]2O)c(=O)n1	2	nuclear receptor coactivator 3 isoform a	(Homo sapiens (Human))			7.53E+3
D13529	C00042440	0.5	1	0.5	Spike protein S1	7nx9_C	Nc1ccn([C@@H]2O[C@H](CO)[C@@H](O)[C@@H]2O)c(=O)n1	2	nuclear receptor coactivator 3 isoform a	(Homo sapiens (Human))			7.53E+3
D11503	C00003923	0.5	0.897436	0.448718	Spike protein S1	7nxa_C	COc1c(O)c2c(oc(cc2=O)-c2c(O)cccc2O)c(OC)c1OC	2	nuclear receptor coactivator 3 isoform a	(Homo sapiens (Human))					>7.94E+4
D11503	C00003923	0.5	0.897436	0.448718	Spike protein S1	7e8m_A	COc1c(O)c2c(oc(cc2=O)-c2c(O)cccc2O)c(OC)c1OC	2	nuclear receptor coactivator 3 isoform a	(Homo sapiens (Human))					>7.94E+4
D11503	C00003923	0.5	0.897436	0.448718	Spike protein S1	7nxc_B	COc1c(O)c2c(oc(cc2=O)-c2c(O)cccc2O)c(OC)c1OC	2	nuclear receptor coactivator 3 isoform a	(Homo sapiens (Human))					>7.94E+4
D11503	C00003923	0.5	0.897436	0.448718	Spike protein S1	7nxb_C	COc1c(O)c2c(oc(cc2=O)-c2c(O)cccc2O)c(OC)c1OC	2	nuclear receptor coactivator 3 isoform a	(Homo sapiens (Human))					>7.94E+4
D11503	C00003923	0.5	0.897436	0.448718	Spike protein S1	7nx9_C	COc1c(O)c2c(oc(cc2=O)-c2c(O)cccc2O)c(OC)c1OC	2	nuclear receptor coactivator 3 isoform a	(Homo sapiens (Human))					>7.94E+4
D11503	C00001099	0.5	0.857143	0.428571	Spike protein S1	7nxa_C	COc1c(O)c2c(oc(cc2=O)-c2c(O)cccc2O)c(OC)c1OC	2	nuclear receptor coactivator 3 isoform a	(Homo sapiens (Human))					>7.94E+4
D11503	C00001099	0.5	0.857143	0.428571	Spike protein S1	7e8m_A	COc1c(O)c2c(oc(cc2=O)-c2c(O)cccc2O)c(OC)c1OC	2	nuclear receptor coactivator 3 isoform a	(Homo sapiens (Human))					>7.94E+4
D11503	C00001099	0.5	0.857143	0.428571	Spike protein S1	7nxc_B	COc1c(O)c2c(oc(cc2=O)-c2c(O)cccc2O)c(OC)c1OC	2	nuclear receptor coactivator 3 isoform a	(Homo sapiens (Human))					>7.94E+4
D11503	C00001099	0.5	0.857143	0.428571	Spike protein S1	7nxb_C	COc1c(O)c2c(oc(cc2=O)-c2c(O)cccc2O)c(OC)c1OC	2	nuclear receptor coactivator 3 isoform a	(Homo sapiens (Human))					>7.94E+4
D11503	C00001099	0.5	0.857143	0.428571	Spike protein S1	7nx9_C	COc1c(O)c2c(oc(cc2=O)-c2c(O)cccc2O)c(OC)c1OC	2	nuclear receptor coactivator 3 isoform a	(Homo sapiens (Human))					>7.94E+4
D13749	C00032054	0.5	0.85	0.425	Spike protein S1	7nxa_C	O=C(NCCc1ccccc1)c1ccc2OCCOc2c1	2	nuclear receptor coactivator 3 isoform a	(Homo sapiens (Human))			9.59E+3
D13749	C00032054	0.5	0.85	0.425	Spike protein S1	7e8m_A	O=C(NCCc1ccccc1)c1ccc2OCCOc2c1	2	nuclear receptor coactivator 3 isoform a	(Homo sapiens (Human))			9.59E+3
D13749	C00032054	0.5	0.85	0.425	Spike protein S1	7nxc_B	O=C(NCCc1ccccc1)c1ccc2OCCOc2c1	2	nuclear receptor coactivator 3 isoform a	(Homo sapiens (Human))			9.59E+3
D13749	C00032054	0.5	0.85	0.425	Spike protein S1	7nxb_C	O=C(NCCc1ccccc1)c1ccc2OCCOc2c1	2	nuclear receptor coactivator 3 isoform a	(Homo sapiens (Human))			9.59E+3
D13749	C00032054	0.5	0.85	0.425	Spike protein S1	7nx9_C	O=C(NCCc1ccccc1)c1ccc2OCCOc2c1	2	nuclear receptor coactivator 3 isoform a	(Homo sapiens (Human))			9.59E+3
D10931	C00015518	0.6	1	0.6	Spike protein S2,Spike protein S2	6m1v_A	CC[C@H](C)[C@H](N)C(=O)NS(=O)(=O)CC(=O)N[C@]1([C@@H](O)C[C@@H]2[C@H]1CN(C)C=C2C(N)=O)C(O)=O	4	Valyl-tRNA synthetase 2	(Homo sapiens (Human))			126
D10329	C00015518	0.6	0.863636	0.518182	Spike protein S2,Spike protein S2	6m1v_A	CC(C)[C@H](N)C(=O)NS(=O)(=O)CC(=O)N[C@]1([C@@H](O)C[C@@H]2[C@H]1CN(C)C=C2C(N)=O)C(O)=O	4	Valyl-tRNA synthetase 2	(Homo sapiens (Human))			30
D11312	C00018127	0.4	1	0.4	Spike protein S2, Spike protein S2	6lxt_A	CN[C@@H]1C[C@H]2O[C@@](C)([C@@H]1OC)n1c3ccccc3c3c4CNC(=O)c4c4c5ccccc5n2c4c13	4	Serine/threonine-protein kinase TBK1	(Homo sapiens (Human))			2.20
D11312	C00018127	0.4	1	0.4	Spike protein S2, Spike protein S2	6lxt_F	CN[C@@H]1C[C@H]2O[C@@](C)([C@@H]1OC)n1c3ccccc3c3c4CNC(=O)c4c4c5ccccc5n2c4c13	4	Serine/threonine-protein kinase TBK1	(Homo sapiens (Human))			2.20
D11312	C00018127	0.4	1	0.4	Spike protein S2',pan-CoVs inhibitor EK1	7c53_A	CN[C@@H]1C[C@H]2O[C@@](C)([C@@H]1OC)n1c3ccccc3c3c4CNC(=O)c4c4c5ccccc5n2c4c13	4	Transient receptor potential cation channel subfamily M member 6	(Homo sapiens (Human))				>1.00E+4
D11312	C00018127	0.4	1	0.4	Spike protein S2',pan-CoVs inhibitor EK1	7c53_F	CN[C@@H]1C[C@H]2O[C@@](C)([C@@H]1OC)n1c3ccccc3c3c4CNC(=O)c4c4c5ccccc5n2c4c13	4	Transient receptor potential cation channel subfamily M member 6	(Homo sapiens (Human))				>1.00E+4
D11312	C00017543	0.4	0.882353	0.352941	Spike protein S2, Spike protein S2	6lxt_A	CN[C@@H]1C[C@H]2O[C@@](C)([C@@H]1OC)n1c3ccccc3c3c4CNC(=O)c4c4c5ccccc5n2c4c13	4	Serine/threonine-protein kinase TBK1	(Homo sapiens (Human))			2.20
D11312	C00017543	0.4	0.882353	0.352941	Spike protein S2, Spike protein S2	6lxt_F	CN[C@@H]1C[C@H]2O[C@@](C)([C@@H]1OC)n1c3ccccc3c3c4CNC(=O)c4c4c5ccccc5n2c4c13	4	Serine/threonine-protein kinase TBK1	(Homo sapiens (Human))			2.20
D11312	C00017543	0.4	0.882353	0.352941	Spike protein S2',pan-CoVs inhibitor EK1	7c53_A	CN[C@@H]1C[C@H]2O[C@@](C)([C@@H]1OC)n1c3ccccc3c3c4CNC(=O)c4c4c5ccccc5n2c4c13	4	Transient receptor potential cation channel subfamily M member 6	(Homo sapiens (Human))				>1.00E+4
D11312	C00017543	0.4	0.882353	0.352941	Spike protein S2',pan-CoVs inhibitor EK1	7c53_F	CN[C@@H]1C[C@H]2O[C@@](C)([C@@H]1OC)n1c3ccccc3c3c4CNC(=O)c4c4c5ccccc5n2c4c13	4	Transient receptor potential cation channel subfamily M member 6	(Homo sapiens (Human))				>1.00E+4
D11312	C00027661	0.4	0.855072	0.342029	Spike protein S2, Spike protein S2	6lxt_A	CN[C@@H]1C[C@H]2O[C@@](C)([C@@H]1OC)n1c3ccccc3c3c4CNC(=O)c4c4c5ccccc5n2c4c13	4	Serine/threonine-protein kinase TBK1	(Homo sapiens (Human))			2.20
D11312	C00027661	0.4	0.855072	0.342029	Spike protein S2, Spike protein S2	6lxt_F	CN[C@@H]1C[C@H]2O[C@@](C)([C@@H]1OC)n1c3ccccc3c3c4CNC(=O)c4c4c5ccccc5n2c4c13	4	Serine/threonine-protein kinase TBK1	(Homo sapiens (Human))			2.20
D11312	C00027661	0.4	0.855072	0.342029	Spike protein S2',pan-CoVs inhibitor EK1	7c53_A	CN[C@@H]1C[C@H]2O[C@@](C)([C@@H]1OC)n1c3ccccc3c3c4CNC(=O)c4c4c5ccccc5n2c4c13	4	Transient receptor potential cation channel subfamily M member 6	(Homo sapiens (Human))				>1.00E+4
D11312	C00027661	0.4	0.855072	0.342029	Spike protein S2',pan-CoVs inhibitor EK1	7c53_F	CN[C@@H]1C[C@H]2O[C@@](C)([C@@H]1OC)n1c3ccccc3c3c4CNC(=O)c4c4c5ccccc5n2c4c13	4	Transient receptor potential cation channel subfamily M member 6	(Homo sapiens (Human))				>1.00E+4
D10943	C00000218	0.3	1	0.3	Spike protein S2',pan-CoVs inhibitor EK1	7c53_A	CC\C=C/C[C@@H]1[C@@H](CC(O)=O)CCC1=O	4	Aldo-keto reductase family 1 member C4 (AK1C4)	(Homo sapiens (Human))	3.70E+4
D10943	C00000218	0.3	1	0.3	Spike protein S2',pan-CoVs inhibitor EK1	7c53_F	CC\C=C/C[C@@H]1[C@@H](CC(O)=O)CCC1=O	4	Aldo-keto reductase family 1 member C4 (AK1C4)	(Homo sapiens (Human))	3.70E+4
D10943	C00000446	0.3	1	0.3	Spike protein S2',pan-CoVs inhibitor EK1	7c53_A	CC\C=C/C[C@@H]1[C@@H](CC(O)=O)CCC1=O	4	Aldo-keto reductase family 1 member C4 (AK1C4)	(Homo sapiens (Human))	3.70E+4
D10943	C00000446	0.3	1	0.3	Spike protein S2',pan-CoVs inhibitor EK1	7c53_F	CC\C=C/C[C@@H]1[C@@H](CC(O)=O)CCC1=O	4	Aldo-keto reductase family 1 member C4 (AK1C4)	(Homo sapiens (Human))	3.70E+4
D10943	C00049053	0.3	1	0.3	Spike protein S2',pan-CoVs inhibitor EK1	7c53_A	CC\C=C/C[C@@H]1[C@@H](CC(O)=O)CCC1=O	4	Aldo-keto reductase family 1 member C4 (AK1C4)	(Homo sapiens (Human))	3.70E+4
D10943	C00049053	0.3	1	0.3	Spike protein S2',pan-CoVs inhibitor EK1	7c53_F	CC\C=C/C[C@@H]1[C@@H](CC(O)=O)CCC1=O	4	Aldo-keto reductase family 1 member C4 (AK1C4)	(Homo sapiens (Human))	3.70E+4
D11389	C00017726	0.3	1	0.3	Spike protein S2, Spike protein S2	6lxt_A	COC(=O)[C@]1(O)CC2O[C@]1(C)n1c3ccccc3c3c4CNC(=O)c4c4c5ccccc5n2c4c13	4	Serine/threonine-protein kinase TBK1	(Homo sapiens (Human))			<1
D11389	C00017726	0.3	1	0.3	Spike protein S2, Spike protein S2	6lxt_F	COC(=O)[C@]1(O)CC2O[C@]1(C)n1c3ccccc3c3c4CNC(=O)c4c4c5ccccc5n2c4c13	4	Serine/threonine-protein kinase TBK1	(Homo sapiens (Human))			<1
D11870	C00030512	0.3	1	0.3	Spike protein S2',pan-CoVs inhibitor EK1	7c53_A	COc1ccc2n(C(=O)c3ccc(Cl)cc3)c(C)c(CC(O)=O)c2c1	4	Aldo-keto reductase family 1 member C4 (AK1C4)	(Homo sapiens (Human))			5.40E+4
D11870	C00030512	0.3	1	0.3	Spike protein S2',pan-CoVs inhibitor EK1	7c53_F	COc1ccc2n(C(=O)c3ccc(Cl)cc3)c(C)c(CC(O)=O)c2c1	4	Aldo-keto reductase family 1 member C4 (AK1C4)	(Homo sapiens (Human))			5.40E+4
D14079	C00045536	0.3	1	0.3	Spike protein S2',pan-CoVs inhibitor EK1	7c53_A	OC[C@@H](O)[C@H]1N[C@H](CO)[C@@H](O)[C@@H]1O	4	Glycogen debranching enzyme	(Homo sapiens (Human))			1.00E+5
D14079	C00045536	0.3	1	0.3	Spike protein S2',pan-CoVs inhibitor EK1	7c53_F	OC[C@@H](O)[C@H]1N[C@H](CO)[C@@H](O)[C@@H]1O	4	Glycogen debranching enzyme	(Homo sapiens (Human))			1.00E+5
D14083	C00002035	0.3	1	0.3	Spike protein S2',pan-CoVs inhibitor EK1	7c53_A	OC[C@@H]1NC[C@H](O)[C@@H](O)[C@@H]1O	4	Glycogen debranching enzyme	(Homo sapiens (Human))			>1.00E+5
D14083	C00002035	0.3	1	0.3	Spike protein S2',pan-CoVs inhibitor EK1	7c53_F	OC[C@@H]1NC[C@H](O)[C@@H](O)[C@@H]1O	4	Glycogen debranching enzyme	(Homo sapiens (Human))			>1.00E+5
D14083	C00029420	0.3	1	0.3	Spike protein S2',pan-CoVs inhibitor EK1	7c53_A	OC[C@@H]1NC[C@H](O)[C@@H](O)[C@@H]1O	4	Glycogen debranching enzyme	(Homo sapiens (Human))			>1.00E+5
D14083	C00029420	0.3	1	0.3	Spike protein S2',pan-CoVs inhibitor EK1	7c53_F	OC[C@@H]1NC[C@H](O)[C@@H](O)[C@@H]1O	4	Glycogen debranching enzyme	(Homo sapiens (Human))			>1.00E+5
D14084	C00002035	0.3	1	0.3	Spike protein S2',pan-CoVs inhibitor EK1	7c53_A	OC[C@@H]1NC[C@H](O)[C@@H](O)[C@H]1O	4	Glycogen debranching enzyme	(Homo sapiens (Human))			>1.00E+5
D14084	C00002035	0.3	1	0.3	Spike protein S2',pan-CoVs inhibitor EK1	7c53_F	OC[C@@H]1NC[C@H](O)[C@@H](O)[C@H]1O	4	Glycogen debranching enzyme	(Homo sapiens (Human))			>1.00E+5
D14084	C00029420	0.3	1	0.3	Spike protein S2',pan-CoVs inhibitor EK1	7c53_A	OC[C@@H]1NC[C@H](O)[C@@H](O)[C@H]1O	4	Glycogen debranching enzyme	(Homo sapiens (Human))			>1.00E+5
D14084	C00029420	0.3	1	0.3	Spike protein S2',pan-CoVs inhibitor EK1	7c53_F	OC[C@@H]1NC[C@H](O)[C@@H](O)[C@H]1O	4	Glycogen debranching enzyme	(Homo sapiens (Human))			>1.00E+5
D14085	C00036384-2	0.3	1	0.3	Spike protein S2',pan-CoVs inhibitor EK1	7c53_A	OC[C@@H]1NC[C@H](O)[C@H]1O	4	Glycogen debranching enzyme	(Homo sapiens (Human))			2.00E+5
D14085	C00036384-2	0.3	1	0.3	Spike protein S2',pan-CoVs inhibitor EK1	7c53_F	OC[C@@H]1NC[C@H](O)[C@H]1O	4	Glycogen debranching enzyme	(Homo sapiens (Human))			2.00E+5
D14085	C00036384	0.3	1	0.3	Spike protein S2',pan-CoVs inhibitor EK1	7c53_A	OC[C@@H]1NC[C@H](O)[C@H]1O	4	Glycogen debranching enzyme	(Homo sapiens (Human))			2.00E+5
D14085	C00036384	0.3	1	0.3	Spike protein S2',pan-CoVs inhibitor EK1	7c53_F	OC[C@@H]1NC[C@H](O)[C@H]1O	4	Glycogen debranching enzyme	(Homo sapiens (Human))			2.00E+5
D14108	C00036506	0.3	1	0.3	Spike protein S2',pan-CoVs inhibitor EK1	7c53_A	OC[C@H]1NCC[C@@H]1O	4	Glycogen debranching enzyme	(Homo sapiens (Human))			4.80E+4
D14108	C00036506	0.3	1	0.3	Spike protein S2',pan-CoVs inhibitor EK1	7c53_F	OC[C@H]1NCC[C@@H]1O	4	Glycogen debranching enzyme	(Homo sapiens (Human))			4.80E+4
D14109	C00036384-2	0.3	1	0.3	Spike protein S2',pan-CoVs inhibitor EK1	7c53_A	OC[C@H]1NC[C@@H](O)[C@@H]1O	4	Glycogen debranching enzyme	(Homo sapiens (Human))			8.40E+3
D14109	C00036384-2	0.3	1	0.3	Spike protein S2',pan-CoVs inhibitor EK1	7c53_F	OC[C@H]1NC[C@@H](O)[C@@H]1O	4	Glycogen debranching enzyme	(Homo sapiens (Human))			8.40E+3
D14109	C00036384	0.3	1	0.3	Spike protein S2',pan-CoVs inhibitor EK1	7c53_A	OC[C@H]1NC[C@@H](O)[C@@H]1O	4	Glycogen debranching enzyme	(Homo sapiens (Human))			8.40E+3
D14109	C00036384	0.3	1	0.3	Spike protein S2',pan-CoVs inhibitor EK1	7c53_F	OC[C@H]1NC[C@@H](O)[C@@H]1O	4	Glycogen debranching enzyme	(Homo sapiens (Human))			8.40E+3
D14110	C00002035	0.3	1	0.3	Spike protein S2',pan-CoVs inhibitor EK1	7c53_A	OC[C@H]1NC[C@H](O)[C@@H](O)[C@@H]1O	4	Glycogen debranching enzyme	(Homo sapiens (Human))			1.00E+4
D14110	C00002035	0.3	1	0.3	Spike protein S2',pan-CoVs inhibitor EK1	7c53_F	OC[C@H]1NC[C@H](O)[C@@H](O)[C@@H]1O	4	Glycogen debranching enzyme	(Homo sapiens (Human))			1.00E+4
D14110	C00029420	0.3	1	0.3	Spike protein S2',pan-CoVs inhibitor EK1	7c53_A	OC[C@H]1NC[C@H](O)[C@@H](O)[C@@H]1O	4	Glycogen debranching enzyme	(Homo sapiens (Human))			1.00E+4
D14110	C00029420	0.3	1	0.3	Spike protein S2',pan-CoVs inhibitor EK1	7c53_F	OC[C@H]1NC[C@H](O)[C@@H](O)[C@@H]1O	4	Glycogen debranching enzyme	(Homo sapiens (Human))			1.00E+4
D14111	C00002035	0.3	1	0.3	Spike protein S2',pan-CoVs inhibitor EK1	7c53_A	OC[C@H]1NC[C@H](O)[C@@H](O)[C@H]1O	4	Glycogen debranching enzyme	(Homo sapiens (Human))			1.00E+4
D14111	C00002035	0.3	1	0.3	Spike protein S2',pan-CoVs inhibitor EK1	7c53_F	OC[C@H]1NC[C@H](O)[C@@H](O)[C@H]1O	4	Glycogen debranching enzyme	(Homo sapiens (Human))			1.00E+4
D14111	C00029420	0.3	1	0.3	Spike protein S2',pan-CoVs inhibitor EK1	7c53_A	OC[C@H]1NC[C@H](O)[C@@H](O)[C@H]1O	4	Glycogen debranching enzyme	(Homo sapiens (Human))			1.00E+4
D14111	C00029420	0.3	1	0.3	Spike protein S2',pan-CoVs inhibitor EK1	7c53_F	OC[C@H]1NC[C@H](O)[C@@H](O)[C@H]1O	4	Glycogen debranching enzyme	(Homo sapiens (Human))			1.00E+4
D14112	C00002037	0.3	1	0.3	Spike protein S2',pan-CoVs inhibitor EK1	7c53_A	OC[C@H]1N[C@@H](CO)[C@@H](O)[C@@H]1O	4	Glycogen debranching enzyme	(Homo sapiens (Human))			1.10E+4
D14112	C00002037	0.3	1	0.3	Spike protein S2',pan-CoVs inhibitor EK1	7c53_F	OC[C@H]1N[C@@H](CO)[C@@H](O)[C@@H]1O	4	Glycogen debranching enzyme	(Homo sapiens (Human))			1.10E+4
D14112	C00042067	0.3	1	0.3	Spike protein S2',pan-CoVs inhibitor EK1	7c53_A	OC[C@H]1N[C@@H](CO)[C@@H](O)[C@@H]1O	4	Glycogen debranching enzyme	(Homo sapiens (Human))			1.10E+4
D14112	C00042067	0.3	1	0.3	Spike protein S2',pan-CoVs inhibitor EK1	7c53_F	OC[C@H]1N[C@@H](CO)[C@@H](O)[C@@H]1O	4	Glycogen debranching enzyme	(Homo sapiens (Human))			1.10E+4
D14113	C00002037	0.3	1	0.3	Spike protein S2',pan-CoVs inhibitor EK1	7c53_A	OC[C@H]1N[C@H](CO)[C@@H](O)[C@@H]1O	4	Glycogen debranching enzyme	(Homo sapiens (Human))			9.80E+3
D14113	C00002037	0.3	1	0.3	Spike protein S2',pan-CoVs inhibitor EK1	7c53_F	OC[C@H]1N[C@H](CO)[C@@H](O)[C@@H]1O	4	Glycogen debranching enzyme	(Homo sapiens (Human))			9.80E+3
D14113	C00042067	0.3	1	0.3	Spike protein S2',pan-CoVs inhibitor EK1	7c53_A	OC[C@H]1N[C@H](CO)[C@@H](O)[C@@H]1O	4	Glycogen debranching enzyme	(Homo sapiens (Human))			9.80E+3
D14113	C00042067	0.3	1	0.3	Spike protein S2',pan-CoVs inhibitor EK1	7c53_F	OC[C@H]1N[C@H](CO)[C@@H](O)[C@@H]1O	4	Glycogen debranching enzyme	(Homo sapiens (Human))			9.80E+3
D14173	C00002766	0.3	1	0.3	Spike protein S2',pan-CoVs inhibitor EK1	7c53_A	Oc1ccc(\C=C\C(=O)OCCc2ccccc2)cc1O	4	Aldo-keto reductase family 1 member C4 (AK1C4)	(Homo sapiens (Human))			2.30E+3
D14173	C00002766	0.3	1	0.3	Spike protein S2',pan-CoVs inhibitor EK1	7c53_F	Oc1ccc(\C=C\C(=O)OCCc2ccccc2)cc1O	4	Aldo-keto reductase family 1 member C4 (AK1C4)	(Homo sapiens (Human))			2.30E+3
D14112	C00036713	0.3	0.933333	0.28	Spike protein S2',pan-CoVs inhibitor EK1	7c53_A	OC[C@H]1N[C@@H](CO)[C@@H](O)[C@@H]1O	4	Glycogen debranching enzyme	(Homo sapiens (Human))			1.10E+4
D14112	C00036713	0.3	0.933333	0.28	Spike protein S2',pan-CoVs inhibitor EK1	7c53_F	OC[C@H]1N[C@@H](CO)[C@@H](O)[C@@H]1O	4	Glycogen debranching enzyme	(Homo sapiens (Human))			1.10E+4
D14112	C00036798	0.3	0.933333	0.28	Spike protein S2',pan-CoVs inhibitor EK1	7c53_A	OC[C@H]1N[C@@H](CO)[C@@H](O)[C@@H]1O	4	Glycogen debranching enzyme	(Homo sapiens (Human))			1.10E+4
D14112	C00036798	0.3	0.933333	0.28	Spike protein S2',pan-CoVs inhibitor EK1	7c53_F	OC[C@H]1N[C@@H](CO)[C@@H](O)[C@@H]1O	4	Glycogen debranching enzyme	(Homo sapiens (Human))			1.10E+4
D14112	C00036799	0.3	0.933333	0.28	Spike protein S2',pan-CoVs inhibitor EK1	7c53_A	OC[C@H]1N[C@@H](CO)[C@@H](O)[C@@H]1O	4	Glycogen debranching enzyme	(Homo sapiens (Human))			1.10E+4
D14112	C00036799	0.3	0.933333	0.28	Spike protein S2',pan-CoVs inhibitor EK1	7c53_F	OC[C@H]1N[C@@H](CO)[C@@H](O)[C@@H]1O	4	Glycogen debranching enzyme	(Homo sapiens (Human))			1.10E+4
D14112	C00042220	0.3	0.933333	0.28	Spike protein S2',pan-CoVs inhibitor EK1	7c53_A	OC[C@H]1N[C@@H](CO)[C@@H](O)[C@@H]1O	4	Glycogen debranching enzyme	(Homo sapiens (Human))			1.10E+4
D14112	C00042220	0.3	0.933333	0.28	Spike protein S2',pan-CoVs inhibitor EK1	7c53_F	OC[C@H]1N[C@@H](CO)[C@@H](O)[C@@H]1O	4	Glycogen debranching enzyme	(Homo sapiens (Human))			1.10E+4
D14113	C00036713	0.3	0.933333	0.28	Spike protein S2',pan-CoVs inhibitor EK1	7c53_A	OC[C@H]1N[C@H](CO)[C@@H](O)[C@@H]1O	4	Glycogen debranching enzyme	(Homo sapiens (Human))			9.80E+3
D14113	C00036713	0.3	0.933333	0.28	Spike protein S2',pan-CoVs inhibitor EK1	7c53_F	OC[C@H]1N[C@H](CO)[C@@H](O)[C@@H]1O	4	Glycogen debranching enzyme	(Homo sapiens (Human))			9.80E+3
D14113	C00036798	0.3	0.933333	0.28	Spike protein S2',pan-CoVs inhibitor EK1	7c53_A	OC[C@H]1N[C@H](CO)[C@@H](O)[C@@H]1O	4	Glycogen debranching enzyme	(Homo sapiens (Human))			9.80E+3
D14113	C00036798	0.3	0.933333	0.28	Spike protein S2',pan-CoVs inhibitor EK1	7c53_F	OC[C@H]1N[C@H](CO)[C@@H](O)[C@@H]1O	4	Glycogen debranching enzyme	(Homo sapiens (Human))			9.80E+3
D14113	C00036799	0.3	0.933333	0.28	Spike protein S2',pan-CoVs inhibitor EK1	7c53_A	OC[C@H]1N[C@H](CO)[C@@H](O)[C@@H]1O	4	Glycogen debranching enzyme	(Homo sapiens (Human))			9.80E+3
D14113	C00036799	0.3	0.933333	0.28	Spike protein S2',pan-CoVs inhibitor EK1	7c53_F	OC[C@H]1N[C@H](CO)[C@@H](O)[C@@H]1O	4	Glycogen debranching enzyme	(Homo sapiens (Human))			9.80E+3
D14113	C00042220	0.3	0.933333	0.28	Spike protein S2',pan-CoVs inhibitor EK1	7c53_A	OC[C@H]1N[C@H](CO)[C@@H](O)[C@@H]1O	4	Glycogen debranching enzyme	(Homo sapiens (Human))			9.80E+3
D14113	C00042220	0.3	0.933333	0.28	Spike protein S2',pan-CoVs inhibitor EK1	7c53_F	OC[C@H]1N[C@H](CO)[C@@H](O)[C@@H]1O	4	Glycogen debranching enzyme	(Homo sapiens (Human))			9.80E+3
D11389	C00017790	0.3	0.857143	0.257143	Spike protein S2, Spike protein S2	6lxt_A	COC(=O)[C@]1(O)CC2O[C@]1(C)n1c3ccccc3c3c4CNC(=O)c4c4c5ccccc5n2c4c13	4	Serine/threonine-protein kinase TBK1	(Homo sapiens (Human))			<1
D11389	C00017790	0.3	0.857143	0.257143	Spike protein S2, Spike protein S2	6lxt_F	COC(=O)[C@]1(O)CC2O[C@]1(C)n1c3ccccc3c3c4CNC(=O)c4c4c5ccccc5n2c4c13	4	Serine/threonine-protein kinase TBK1	(Homo sapiens (Human))			<1
D14083	C00036384-2	0.3	0.857143	0.257143	Spike protein S2',pan-CoVs inhibitor EK1	7c53_A	OC[C@@H]1NC[C@H](O)[C@@H](O)[C@@H]1O	4	Glycogen debranching enzyme	(Homo sapiens (Human))			>1.00E+5
D14083	C00036384-2	0.3	0.857143	0.257143	Spike protein S2',pan-CoVs inhibitor EK1	7c53_F	OC[C@@H]1NC[C@H](O)[C@@H](O)[C@@H]1O	4	Glycogen debranching enzyme	(Homo sapiens (Human))			>1.00E+5
D14083	C00036384	0.3	0.857143	0.257143	Spike protein S2',pan-CoVs inhibitor EK1	7c53_A	OC[C@@H]1NC[C@H](O)[C@@H](O)[C@@H]1O	4	Glycogen debranching enzyme	(Homo sapiens (Human))			>1.00E+5
D14083	C00036384	0.3	0.857143	0.257143	Spike protein S2',pan-CoVs inhibitor EK1	7c53_F	OC[C@@H]1NC[C@H](O)[C@@H](O)[C@@H]1O	4	Glycogen debranching enzyme	(Homo sapiens (Human))			>1.00E+5
D14084	C00036384-2	0.3	0.857143	0.257143	Spike protein S2',pan-CoVs inhibitor EK1	7c53_A	OC[C@@H]1NC[C@H](O)[C@@H](O)[C@H]1O	4	Glycogen debranching enzyme	(Homo sapiens (Human))			>1.00E+5
D14084	C00036384-2	0.3	0.857143	0.257143	Spike protein S2',pan-CoVs inhibitor EK1	7c53_F	OC[C@@H]1NC[C@H](O)[C@@H](O)[C@H]1O	4	Glycogen debranching enzyme	(Homo sapiens (Human))			>1.00E+5
D14084	C00036384	0.3	0.857143	0.257143	Spike protein S2',pan-CoVs inhibitor EK1	7c53_A	OC[C@@H]1NC[C@H](O)[C@@H](O)[C@H]1O	4	Glycogen debranching enzyme	(Homo sapiens (Human))			>1.00E+5
D14084	C00036384	0.3	0.857143	0.257143	Spike protein S2',pan-CoVs inhibitor EK1	7c53_F	OC[C@@H]1NC[C@H](O)[C@@H](O)[C@H]1O	4	Glycogen debranching enzyme	(Homo sapiens (Human))			>1.00E+5
D14085	C00002035	0.3	0.857143	0.257143	Spike protein S2',pan-CoVs inhibitor EK1	7c53_A	OC[C@@H]1NC[C@H](O)[C@H]1O	4	Glycogen debranching enzyme	(Homo sapiens (Human))			2.00E+5
D14085	C00002035	0.3	0.857143	0.257143	Spike protein S2',pan-CoVs inhibitor EK1	7c53_F	OC[C@@H]1NC[C@H](O)[C@H]1O	4	Glycogen debranching enzyme	(Homo sapiens (Human))			2.00E+5
D14085	C00029420	0.3	0.857143	0.257143	Spike protein S2',pan-CoVs inhibitor EK1	7c53_A	OC[C@@H]1NC[C@H](O)[C@H]1O	4	Glycogen debranching enzyme	(Homo sapiens (Human))			2.00E+5
D14085	C00029420	0.3	0.857143	0.257143	Spike protein S2',pan-CoVs inhibitor EK1	7c53_F	OC[C@@H]1NC[C@H](O)[C@H]1O	4	Glycogen debranching enzyme	(Homo sapiens (Human))			2.00E+5
D14109	C00002035	0.3	0.857143	0.257143	Spike protein S2',pan-CoVs inhibitor EK1	7c53_A	OC[C@H]1NC[C@@H](O)[C@@H]1O	4	Glycogen debranching enzyme	(Homo sapiens (Human))			8.40E+3
D14109	C00002035	0.3	0.857143	0.257143	Spike protein S2',pan-CoVs inhibitor EK1	7c53_F	OC[C@H]1NC[C@@H](O)[C@@H]1O	4	Glycogen debranching enzyme	(Homo sapiens (Human))			8.40E+3
D14109	C00029420	0.3	0.857143	0.257143	Spike protein S2',pan-CoVs inhibitor EK1	7c53_A	OC[C@H]1NC[C@@H](O)[C@@H]1O	4	Glycogen debranching enzyme	(Homo sapiens (Human))			8.40E+3
D14109	C00029420	0.3	0.857143	0.257143	Spike protein S2',pan-CoVs inhibitor EK1	7c53_F	OC[C@H]1NC[C@@H](O)[C@@H]1O	4	Glycogen debranching enzyme	(Homo sapiens (Human))			8.40E+3
D14110	C00036384-2	0.3	0.857143	0.257143	Spike protein S2',pan-CoVs inhibitor EK1	7c53_A	OC[C@H]1NC[C@H](O)[C@@H](O)[C@@H]1O	4	Glycogen debranching enzyme	(Homo sapiens (Human))			1.00E+4
D14110	C00036384-2	0.3	0.857143	0.257143	Spike protein S2',pan-CoVs inhibitor EK1	7c53_F	OC[C@H]1NC[C@H](O)[C@@H](O)[C@@H]1O	4	Glycogen debranching enzyme	(Homo sapiens (Human))			1.00E+4
D14110	C00036384	0.3	0.857143	0.257143	Spike protein S2',pan-CoVs inhibitor EK1	7c53_A	OC[C@H]1NC[C@H](O)[C@@H](O)[C@@H]1O	4	Glycogen debranching enzyme	(Homo sapiens (Human))			1.00E+4
D14110	C00036384	0.3	0.857143	0.257143	Spike protein S2',pan-CoVs inhibitor EK1	7c53_F	OC[C@H]1NC[C@H](O)[C@@H](O)[C@@H]1O	4	Glycogen debranching enzyme	(Homo sapiens (Human))			1.00E+4
D14111	C00036384-2	0.3	0.857143	0.257143	Spike protein S2',pan-CoVs inhibitor EK1	7c53_A	OC[C@H]1NC[C@H](O)[C@@H](O)[C@H]1O	4	Glycogen debranching enzyme	(Homo sapiens (Human))			1.00E+4
D14111	C00036384-2	0.3	0.857143	0.257143	Spike protein S2',pan-CoVs inhibitor EK1	7c53_F	OC[C@H]1NC[C@H](O)[C@@H](O)[C@H]1O	4	Glycogen debranching enzyme	(Homo sapiens (Human))			1.00E+4
D14111	C00036384	0.3	0.857143	0.257143	Spike protein S2',pan-CoVs inhibitor EK1	7c53_A	OC[C@H]1NC[C@H](O)[C@@H](O)[C@H]1O	4	Glycogen debranching enzyme	(Homo sapiens (Human))			1.00E+4
D14111	C00036384	0.3	0.857143	0.257143	Spike protein S2',pan-CoVs inhibitor EK1	7c53_F	OC[C@H]1NC[C@H](O)[C@@H](O)[C@H]1O	4	Glycogen debranching enzyme	(Homo sapiens (Human))			1.00E+4
